# Supplementary material for: Combination of Lacticaseibacillus paracasei BEPC22 and Lactiplantibacillus plantarum BELP53 attenuates fat accumulation and alters the metabolome and gut microbiota in mice with high-fat diet-induced obesity
Source: Royal Society of Chemistry journal article supplement (doi:10.1039/d3fo03557c), 2023-12-15

## Food & Function

# Combination of *Lacticaseibacillus paracasei* BEPC22 and *Lactiplantibacillus plantarum* BELP53 attenuates fat accumulation and alters the metabolome and gut microbiota in mice with high-fat diet-induced obesity

Na-Rae Lee<sup>a¶</sup>, Tae-Jun Kwon<sup>b¶</sup>, Eui-Chun Chung<sup>c¶</sup>, Jaewoong Bae<sup>c¶</sup>, Song-Hui Soung<sup>4</sup>, Hyun-Ji Tak<sup>4</sup>, Jun-Young Choi<sup>b</sup>, Young-Eun Lee<sup>f</sup>, Nak Won Hwang<sup>c</sup>, Jong Seo Lee<sup>c</sup>, Kum-Joo Shin<sup>c</sup>, Choong Hwan Lee<sup>a,d</sup>, KilSoo Kim<sup>b,e\*</sup>, Seokjin Kim<sup>c\*\*</sup>

<sup>a</sup>Research Institute for Bioactive-Metabolome Network, Konkuk University, Seoul 05029, Republic of Korea

<sup>b</sup>Preclinical Research Center, Daegu-Gyeongbuk Medical Innovation Foundation (K-MEDI hub), Daegu 41061, Republic of Korea.

<sup>c</sup>R&D Center, Hecto Healthcare Co., Ltd., Seoul 06142, Republic of Korea.

<sup>d</sup>Department of Bioscience and Biotechnology, Konkuk University, Seoul 05209, Republic of Korea.

<sup>e</sup>College of Veterinary Medicine, Kyungpook National University, 80 Daehakro, Buk-gu, Daegu 41566, Korea.

<sup>f</sup>Cognitive science research group, Korea Brain Research Institute, Daegu 41062

¶These authors contributed equally to this work.

### Corresponding authors

Choong-Hwan Lee<sup>b,e\*</sup>

Professor, Dept. of Preclinical Research Center, Daegu-Gyeongbuk Medical Innovation Foundation (K-MEDI hub)

120 Neungdong-ro, Gwangjin-gu, Daegu, 41061, Republic of Korea

Tel: +82-2-2049-6177

Fax: +82-2-455-4291

E-mail: chlee123@konkuk.ac.kr

Seokjin Kim<sup>c\*\*</sup>

Director, R&D Institute, Hecto Healthcare Co.

5F, Teheran-ro 223, Gangnam-gu, Seoul, 06142, Republic of Korea

Tel: +82-2-6941-0580

Fax: +82-2-543-1649

E-mail: jinkim@hecto.co.kr

# Electronic Supplementary Information

**Lactic acid**

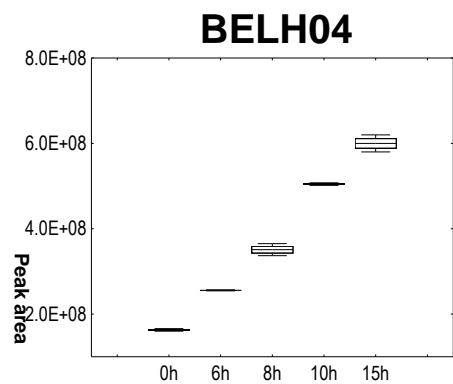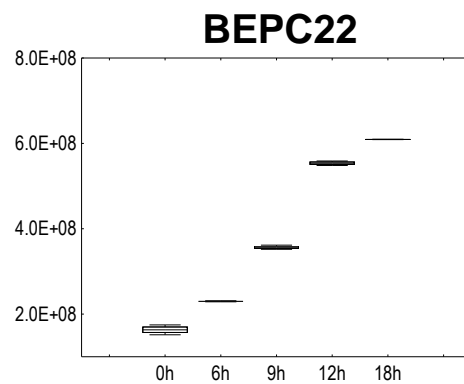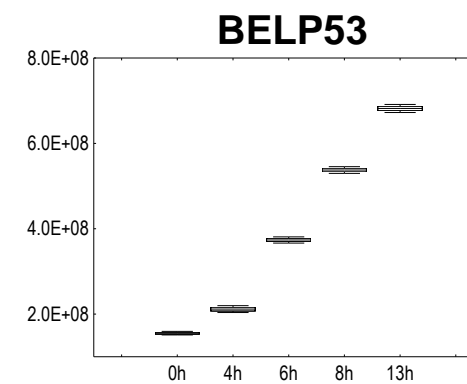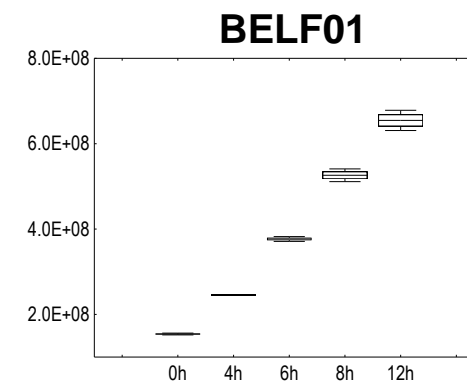

**Glycolic acid**

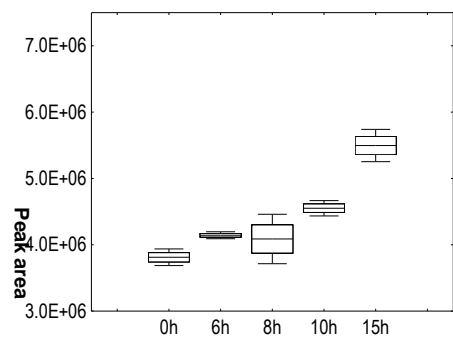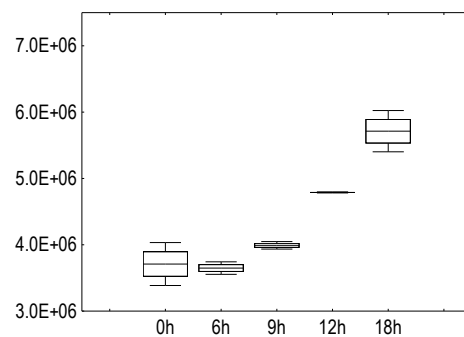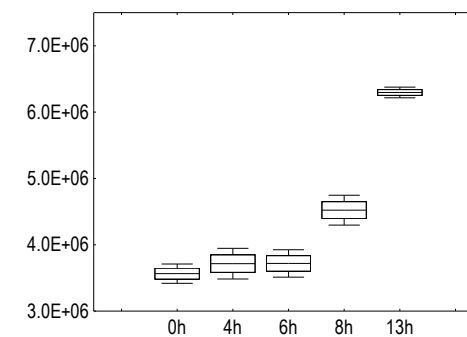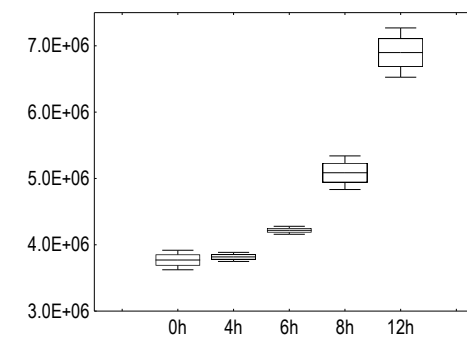

**Oxalic acid**

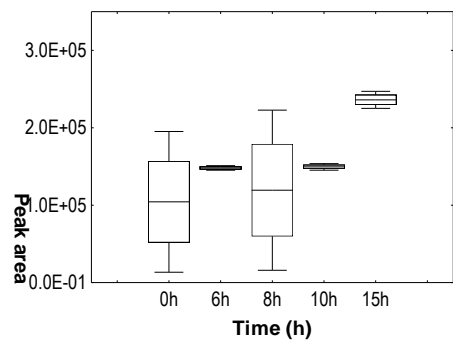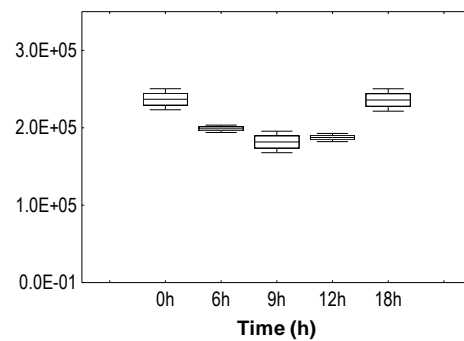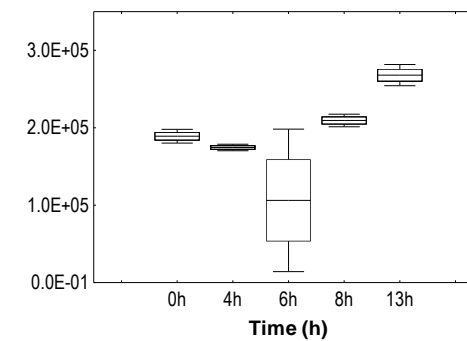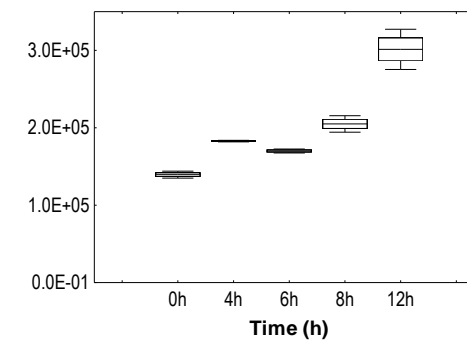

# Electronic Supplementary Information

**Malonic acid**

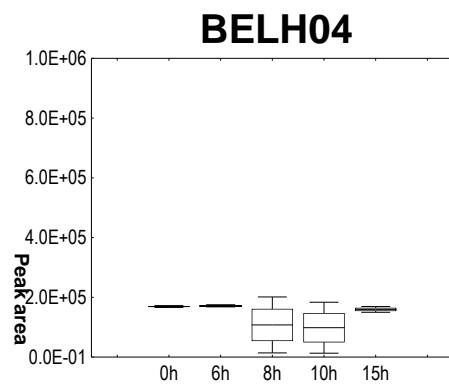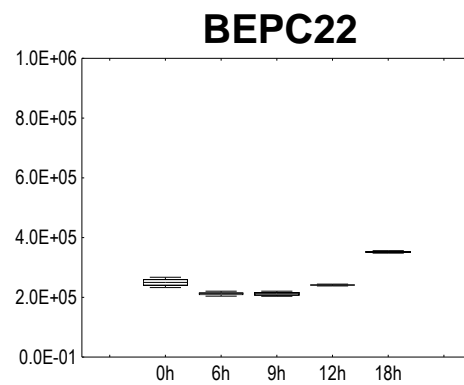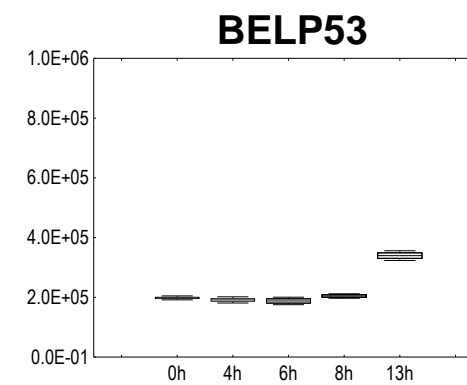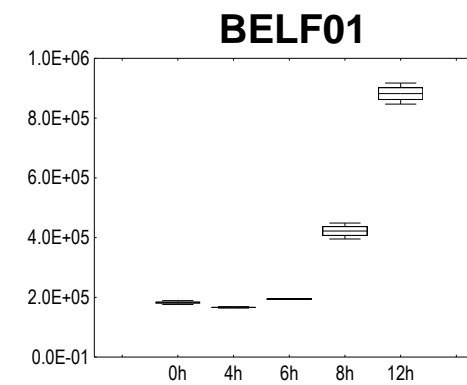

**Urea**

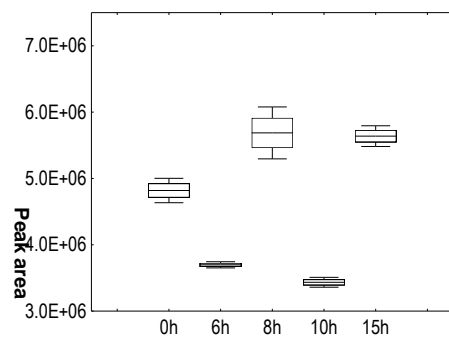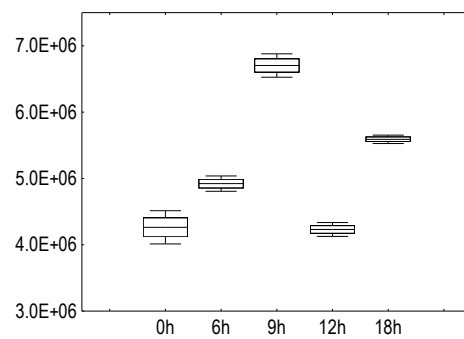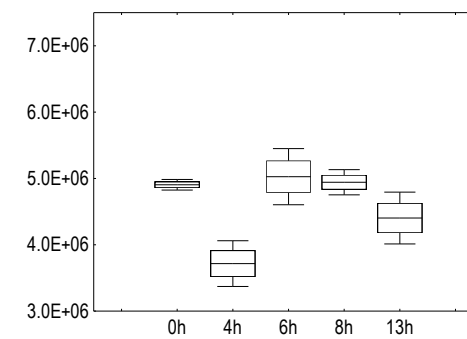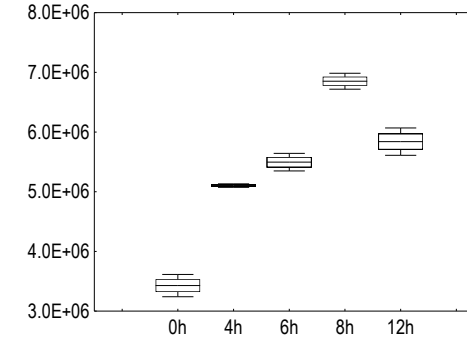

**Succinic acid**

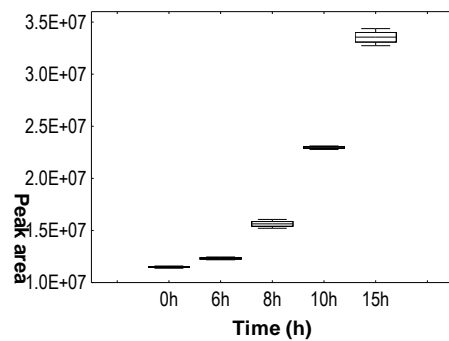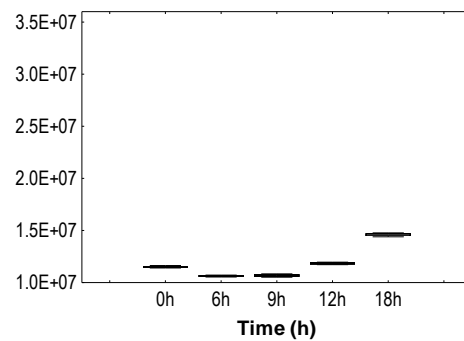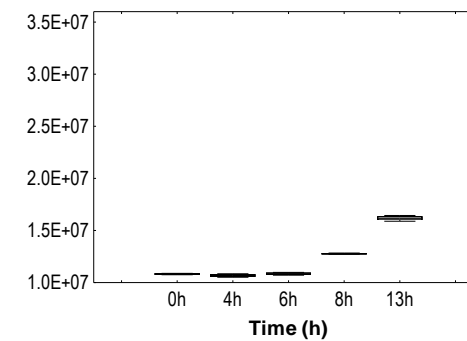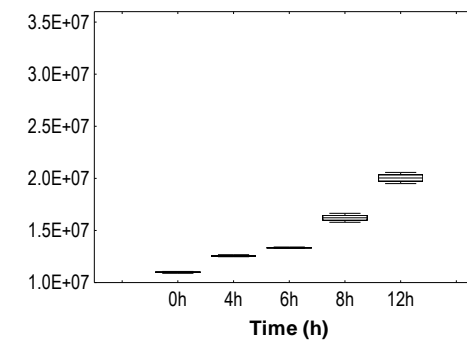

# Electronic Supplementary Information

**Glyceric acid**

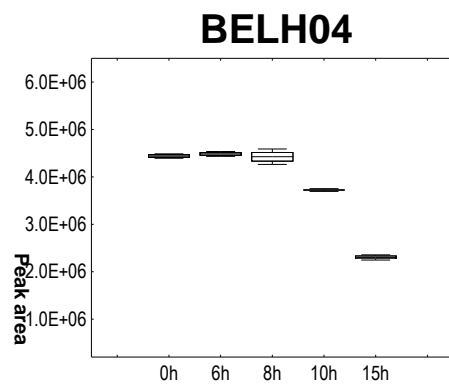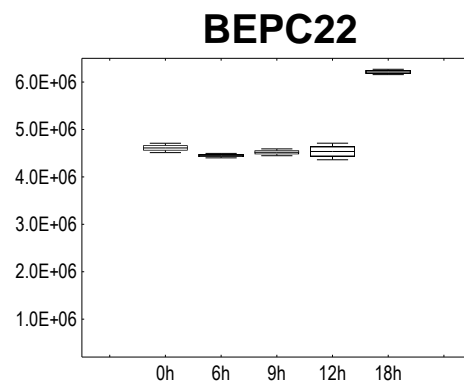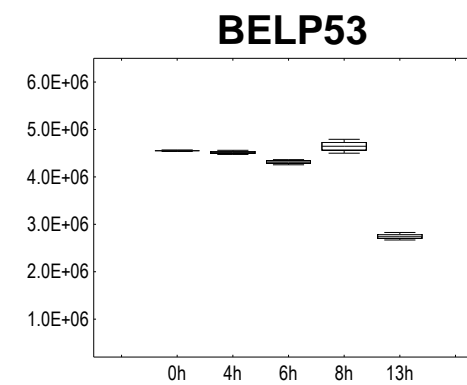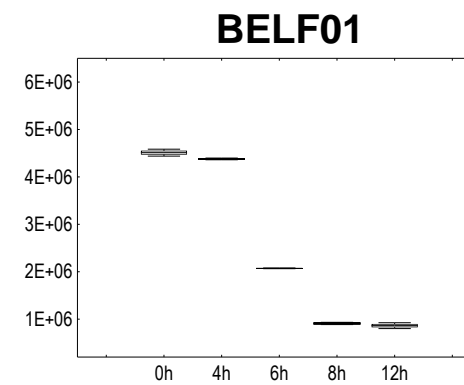

**Malic acid**

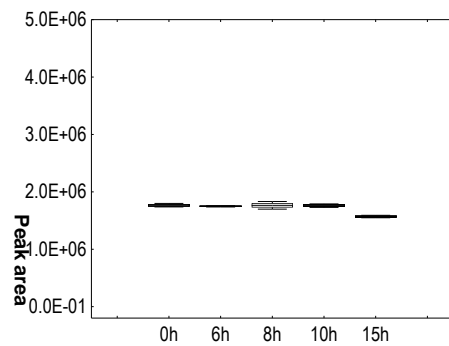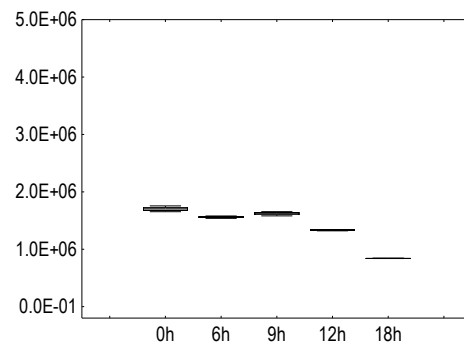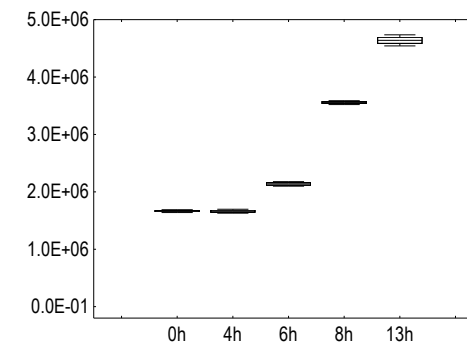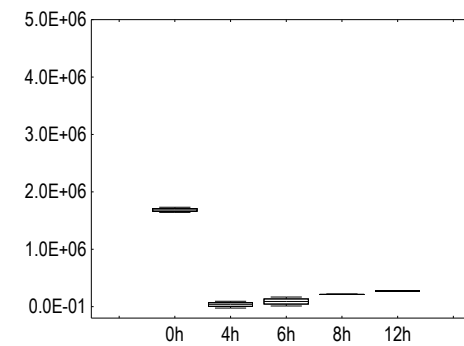

**Taurine**

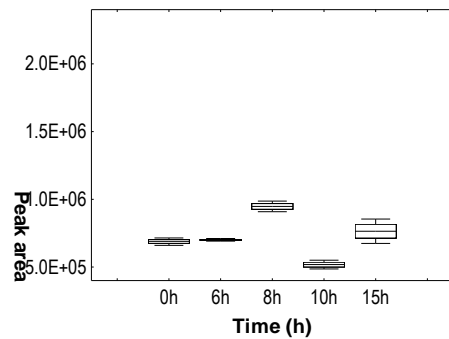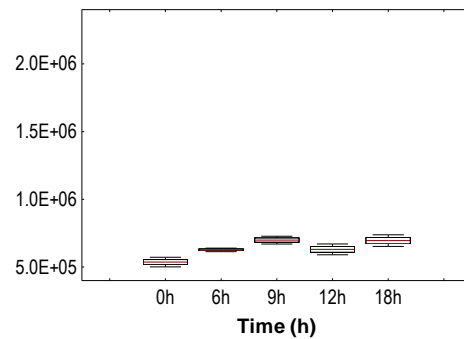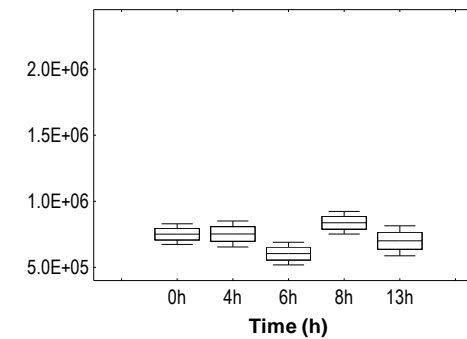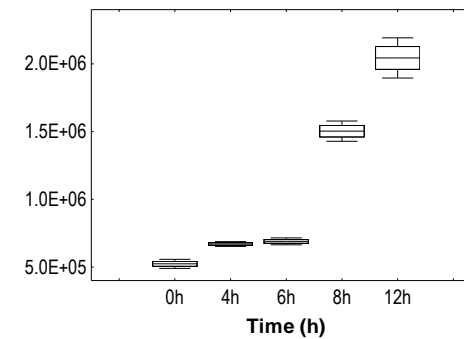

# Electronic Supplementary Information

## BELH04

Orotic acid

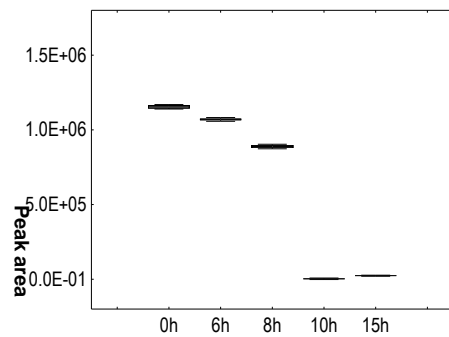

## BEPC22

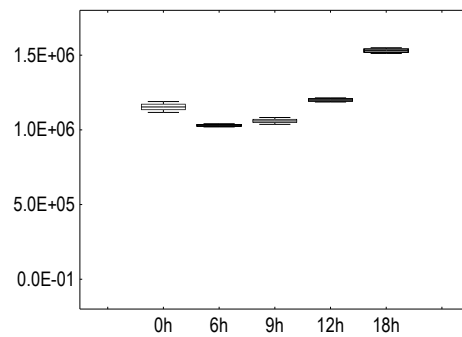

## BELP53

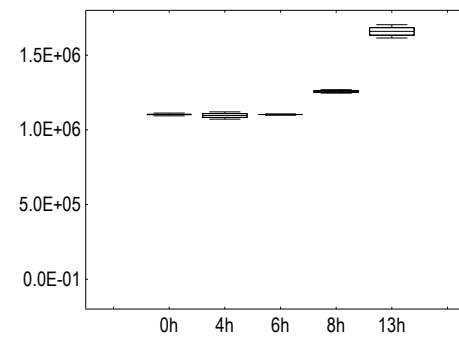

## BELF01

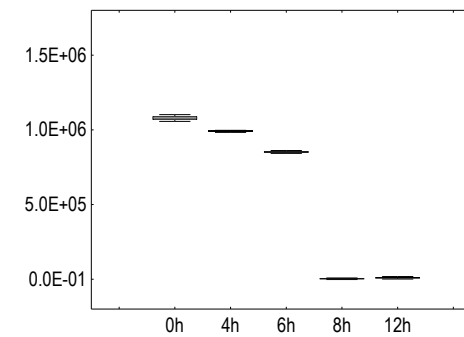

Citric acid

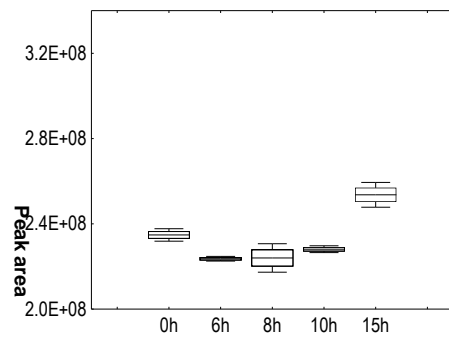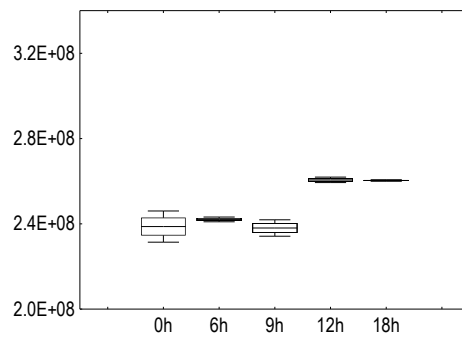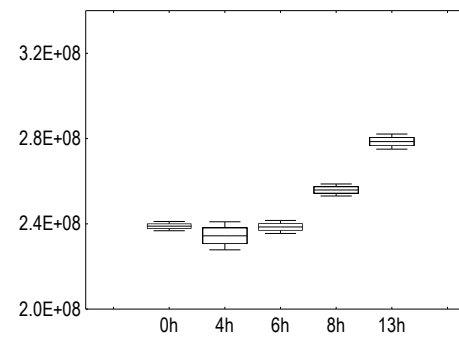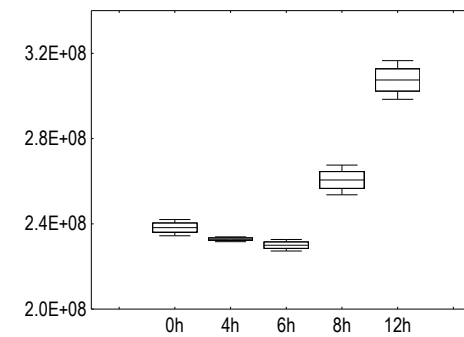

3-Phenyllactic acid

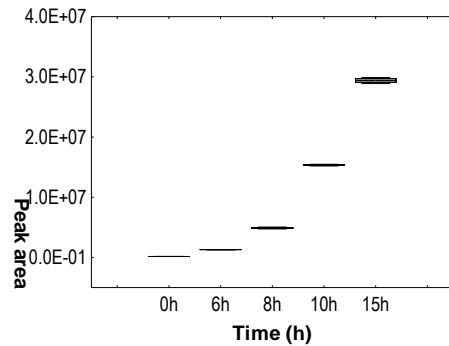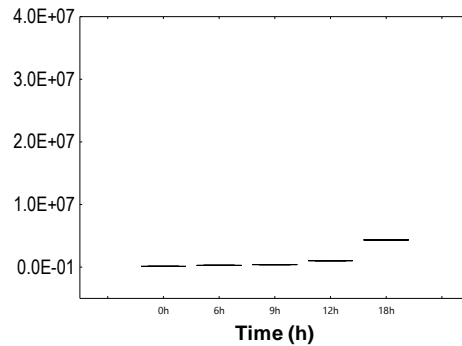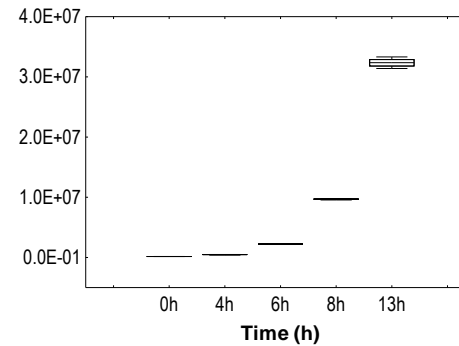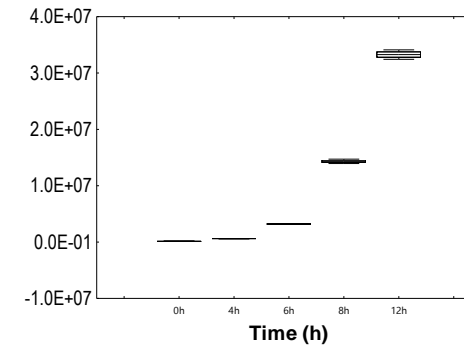

# Electronic Supplementary Information

## BELH04

### Aconitic acid

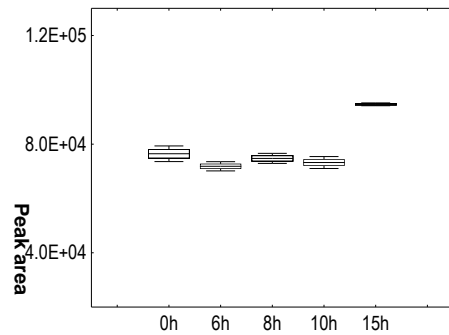

## BEPC22

### Gluconic acid

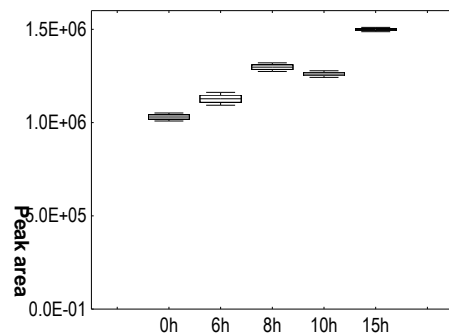

### Alanine

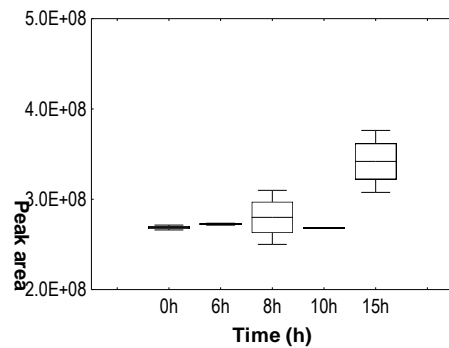

## BELP53

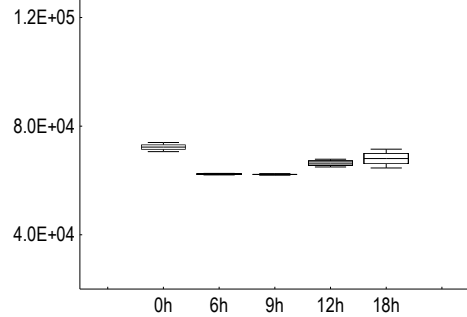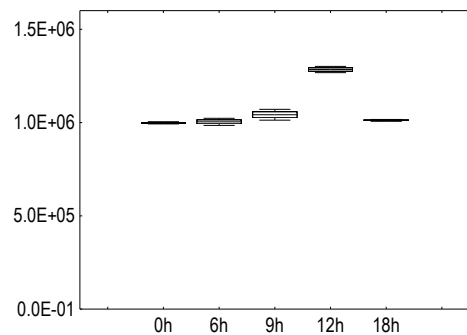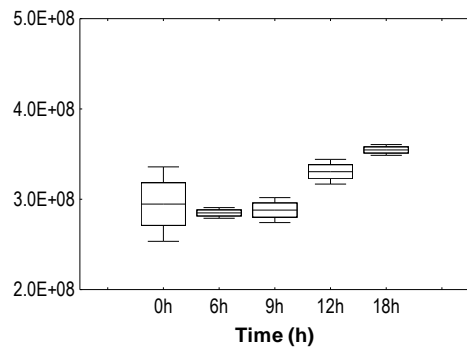

## BELF01

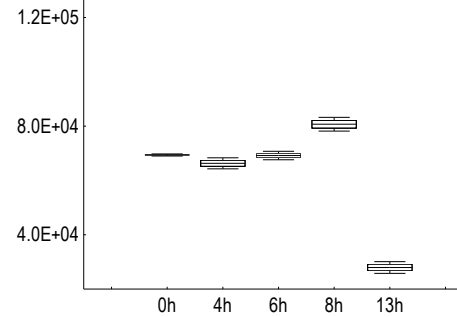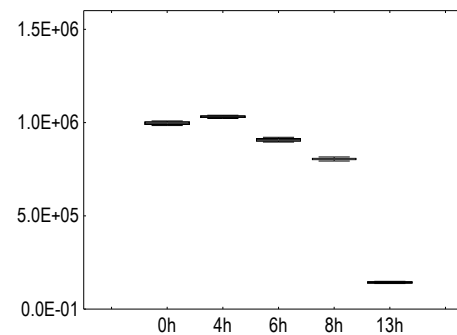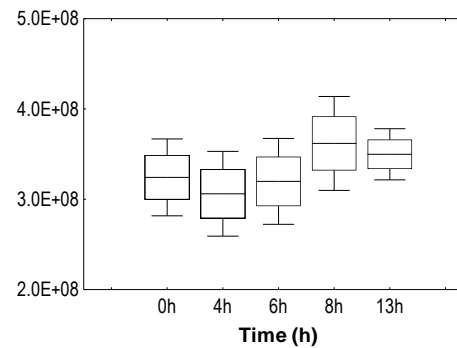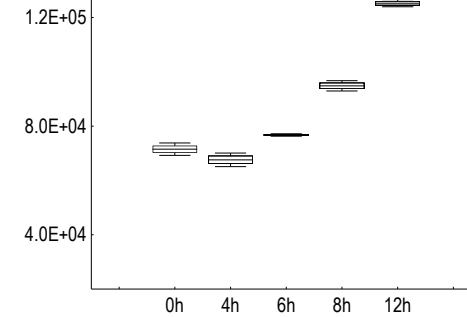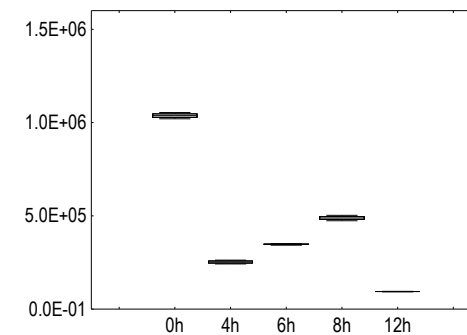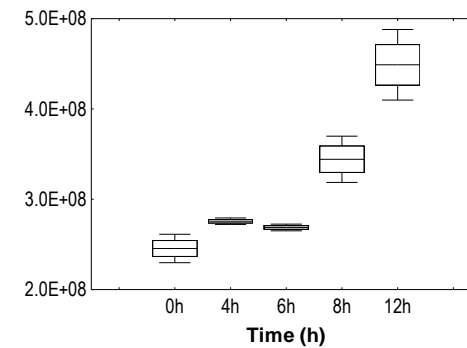

# Electronic Supplementary Information

## BELH04

Valine

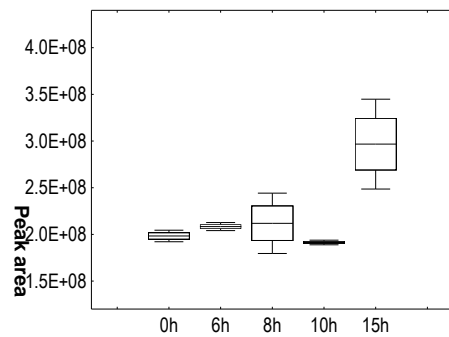

## BEPC22

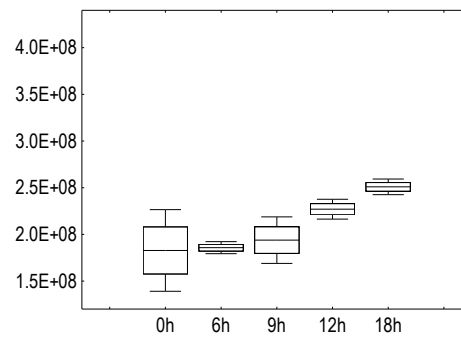

## BELP53

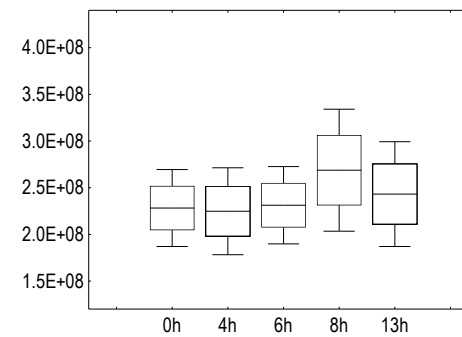

## BELF01

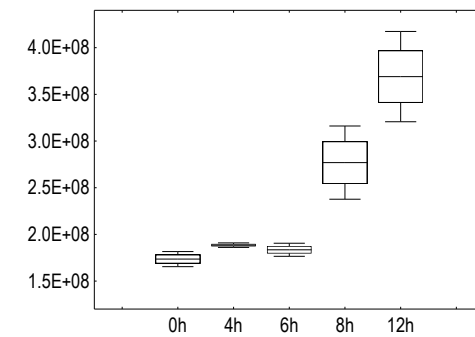

Isoleucine

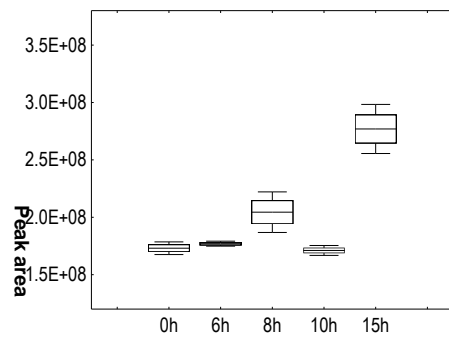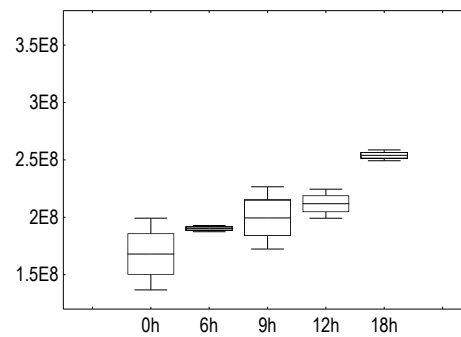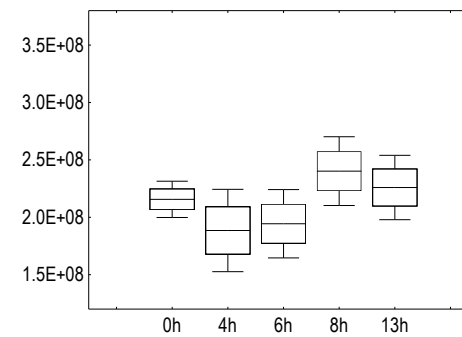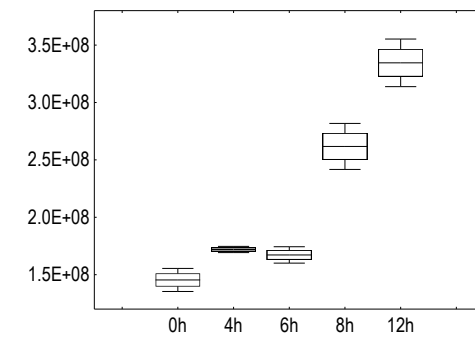

Proline

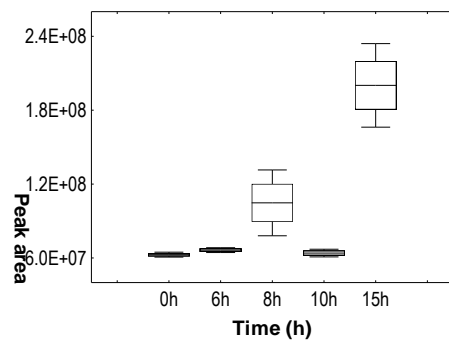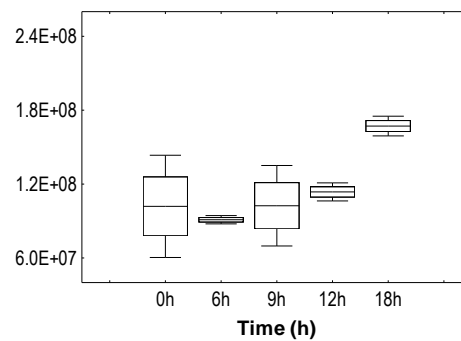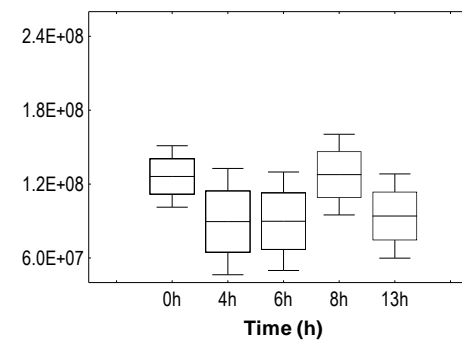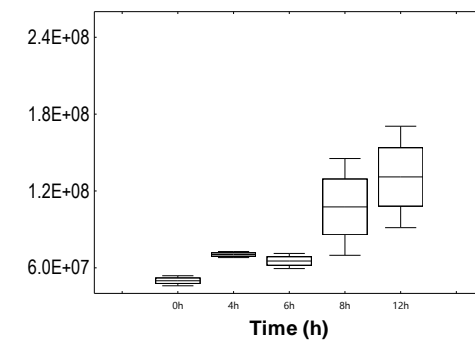

# Electronic Supplementary Information

**Glycine**

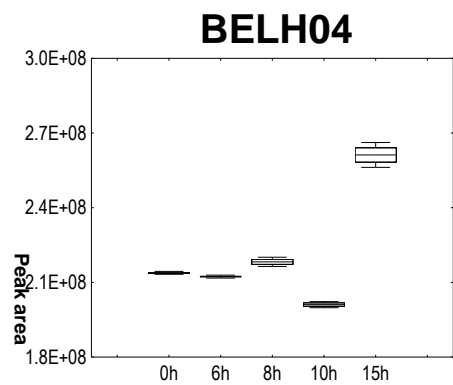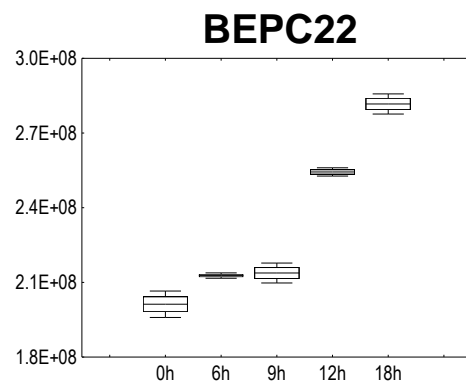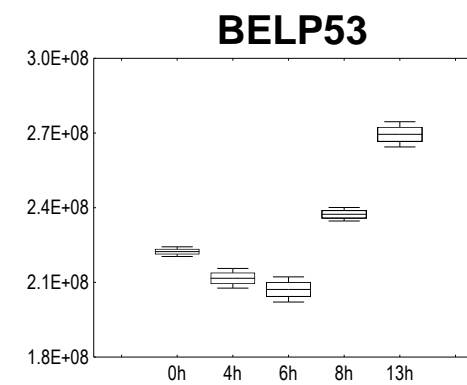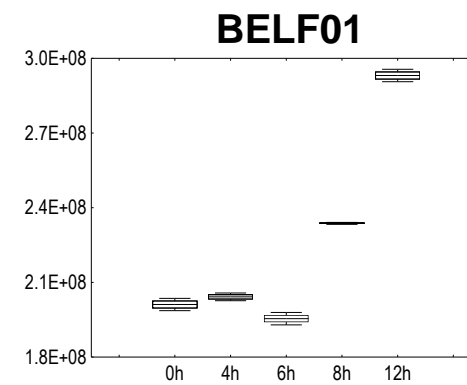

**Serine**

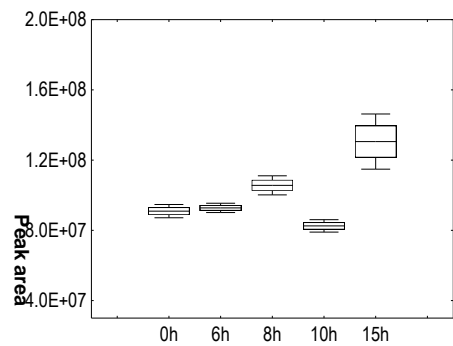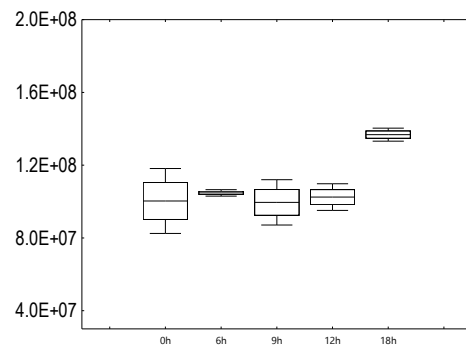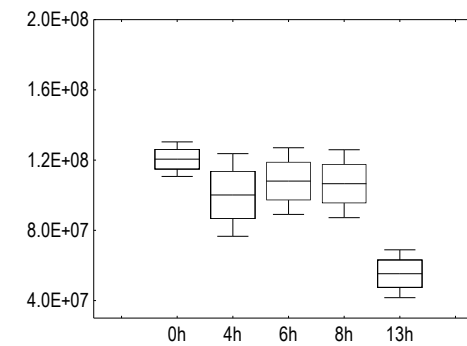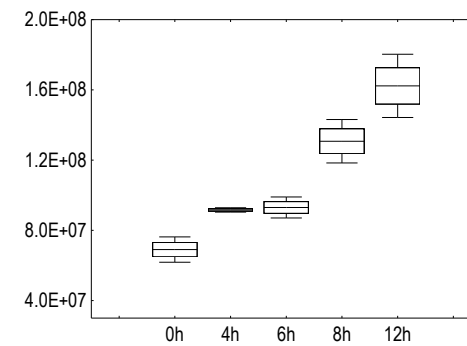

**Threonine**

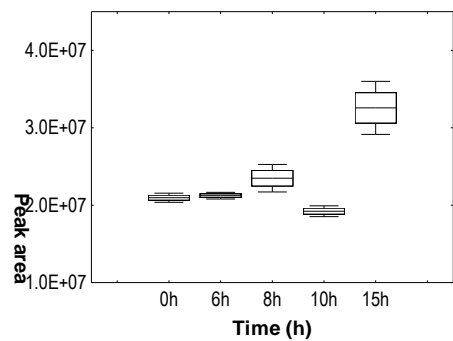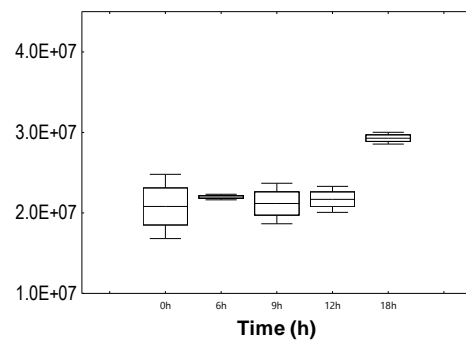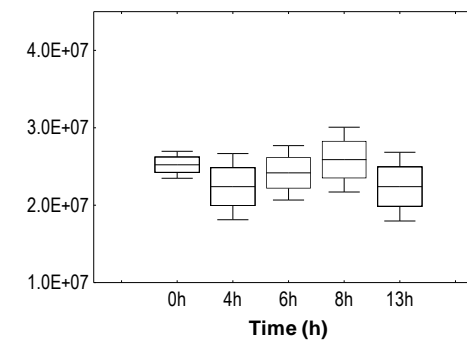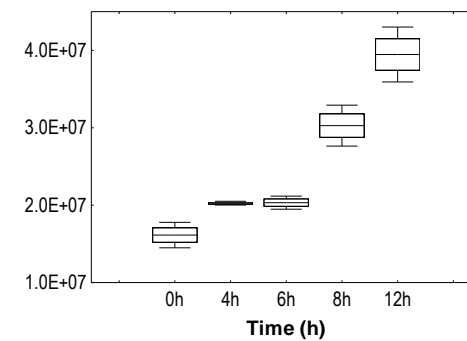



# Electronic Supplementary Information

## BELH04

Aspartic acid

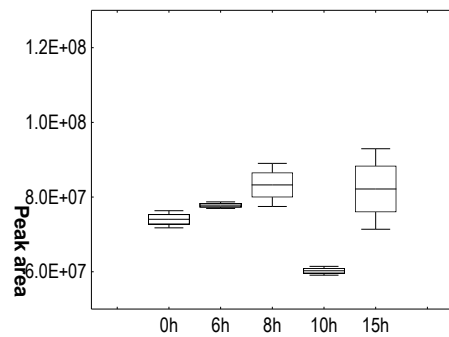

## BEPC22

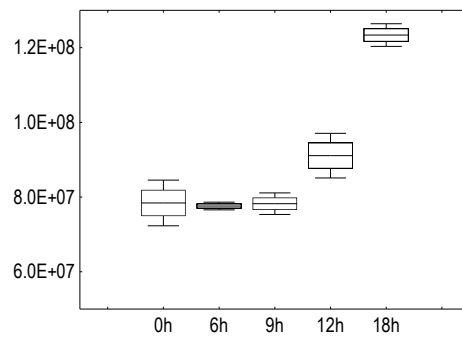

## BELP53

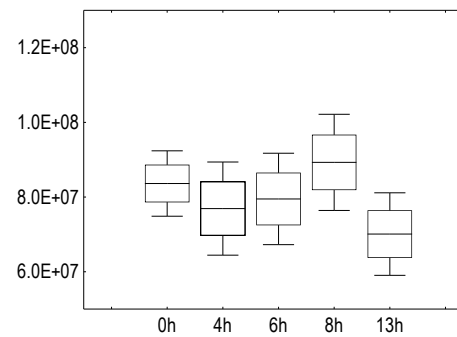

## BELF01

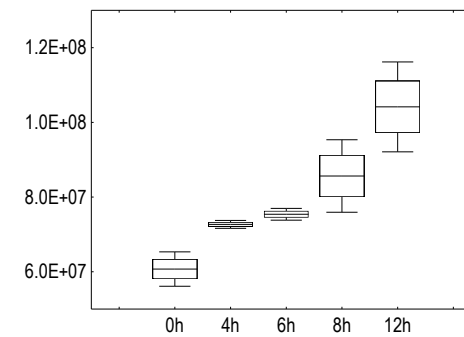

5-Oxoproline

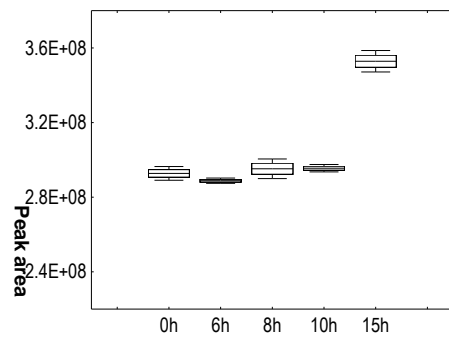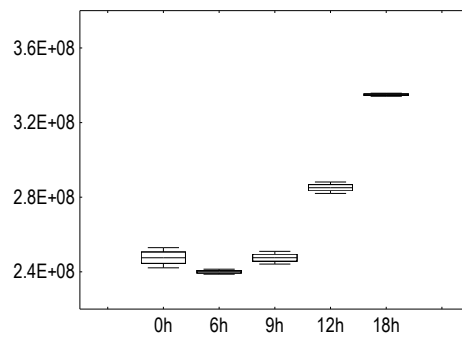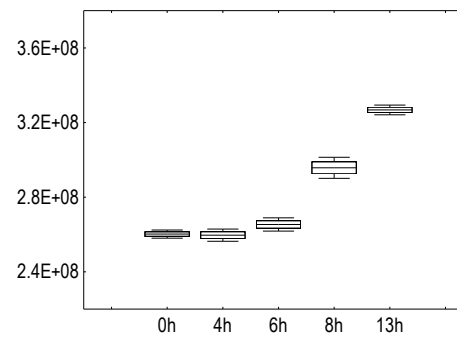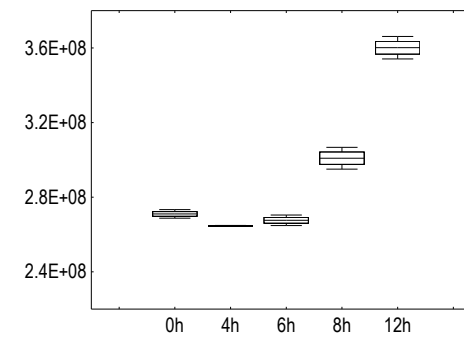

Cysteine

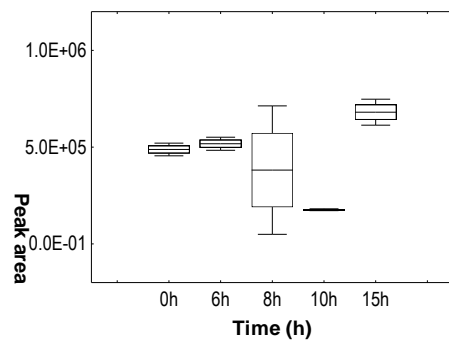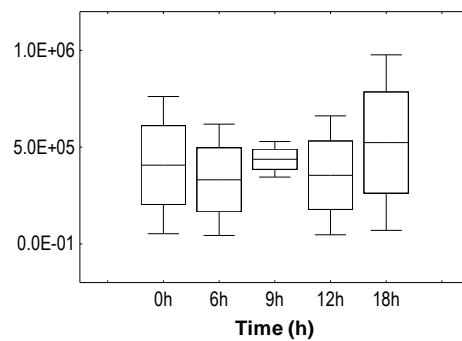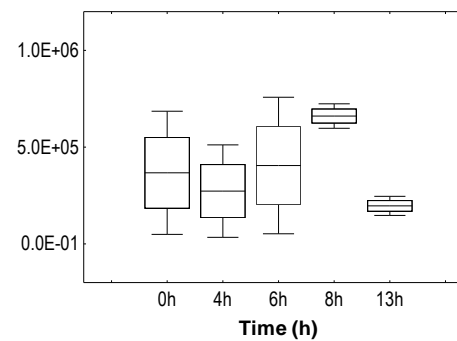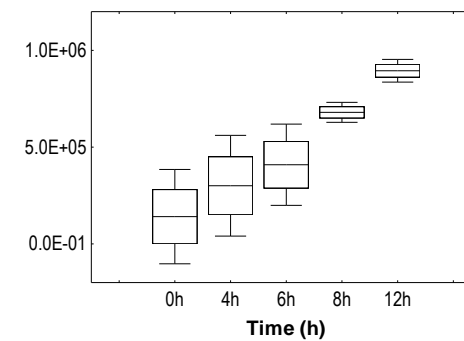

# Electronic Supplementary Information

**2-Hydroxy  
glutaric acid**

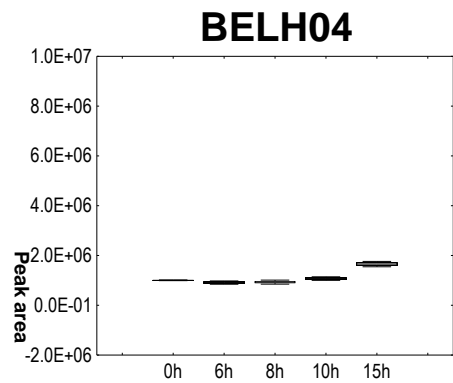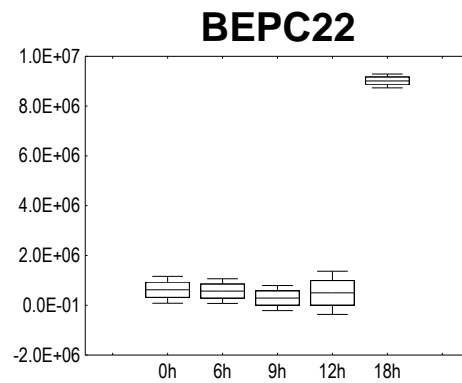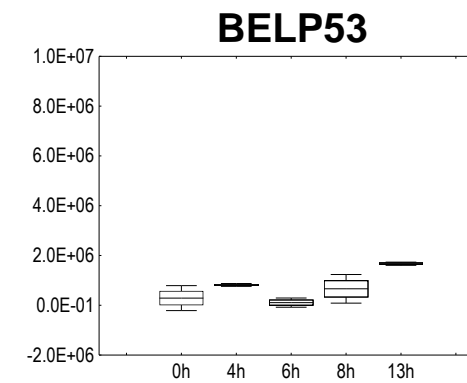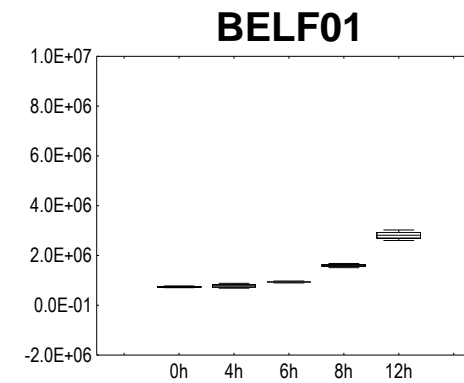

**Ornithine**

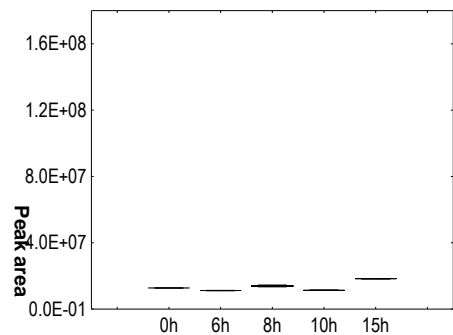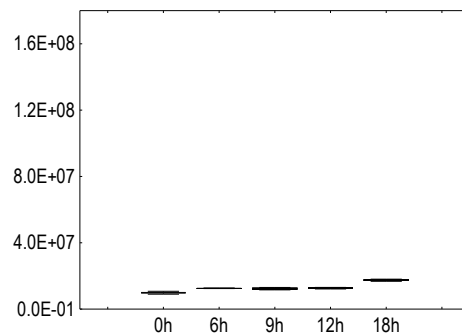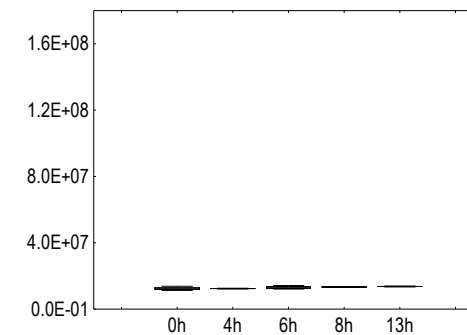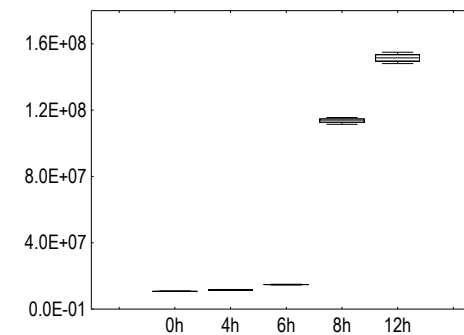

**Glutamic acid**

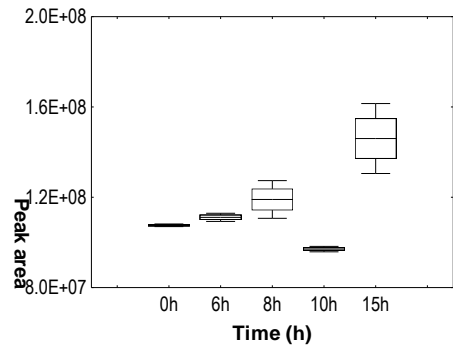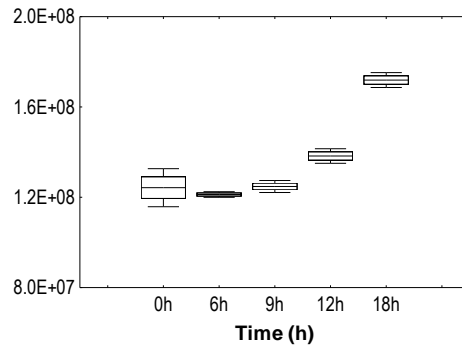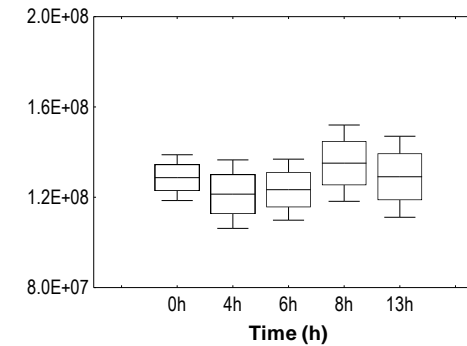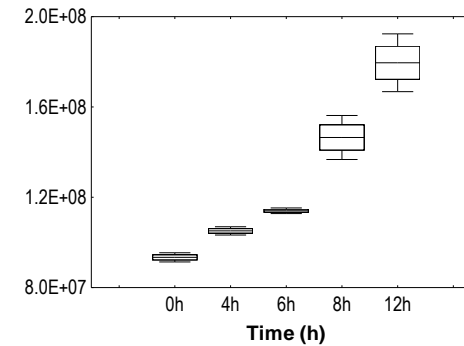

# Electronic Supplementary Information

## Phenylalanine

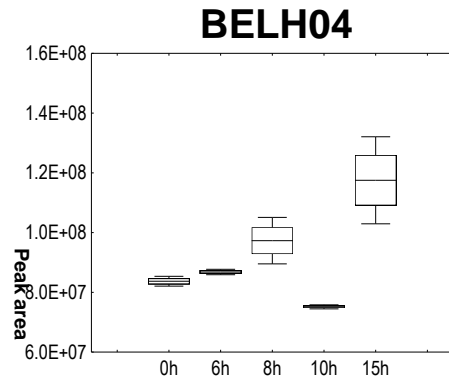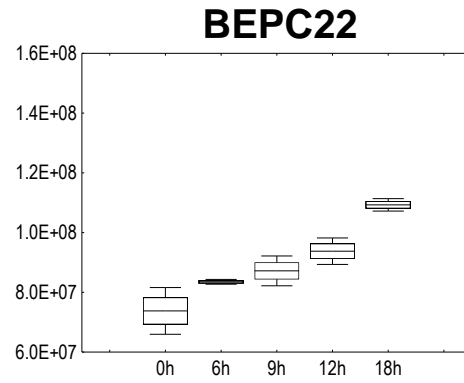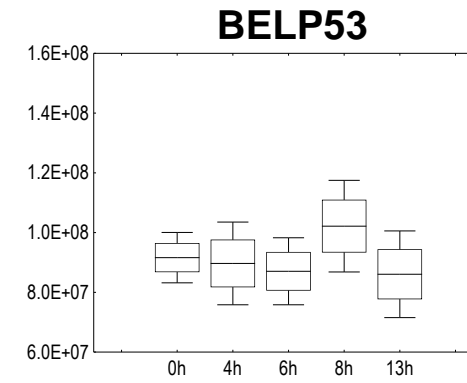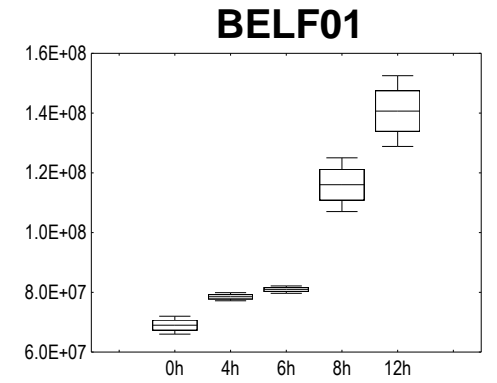

## Asparagine

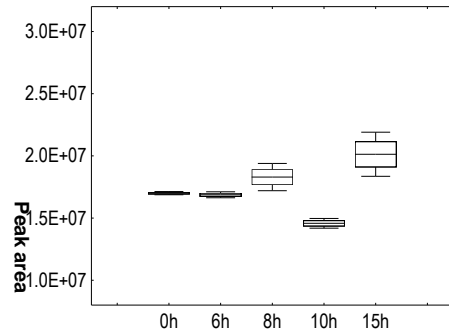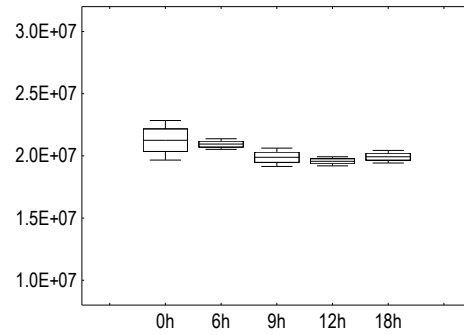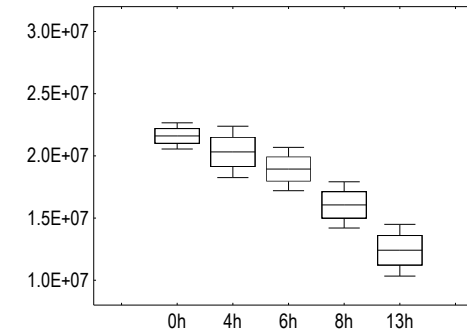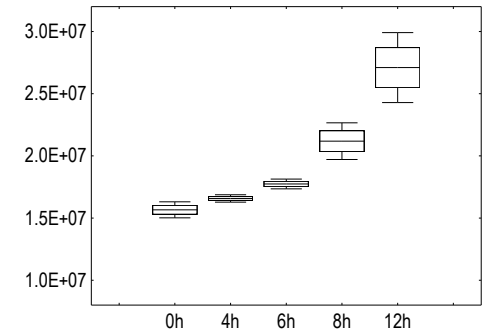

## Lysine

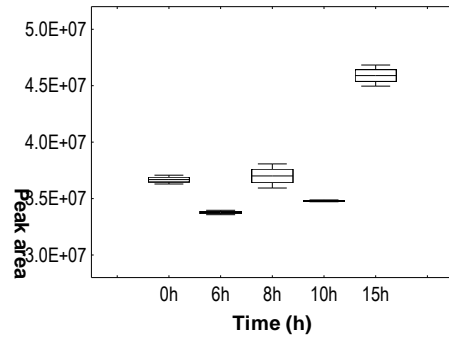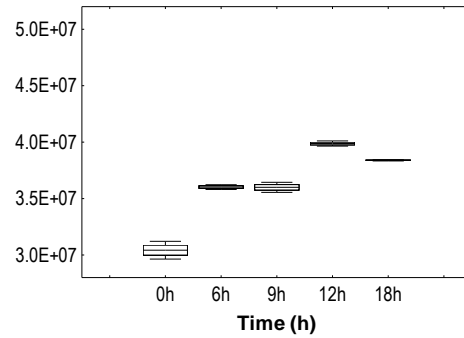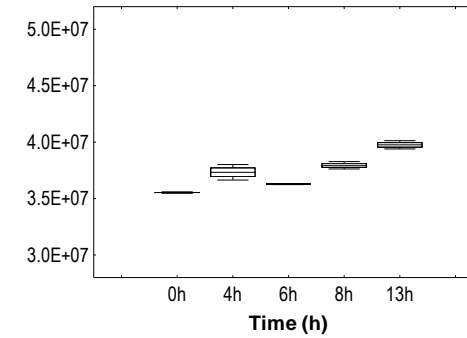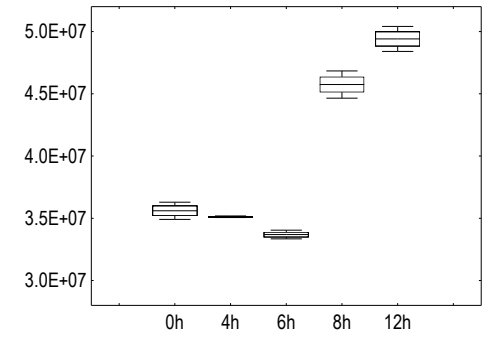

# Electronic Supplementary Information

**Tyrosine**

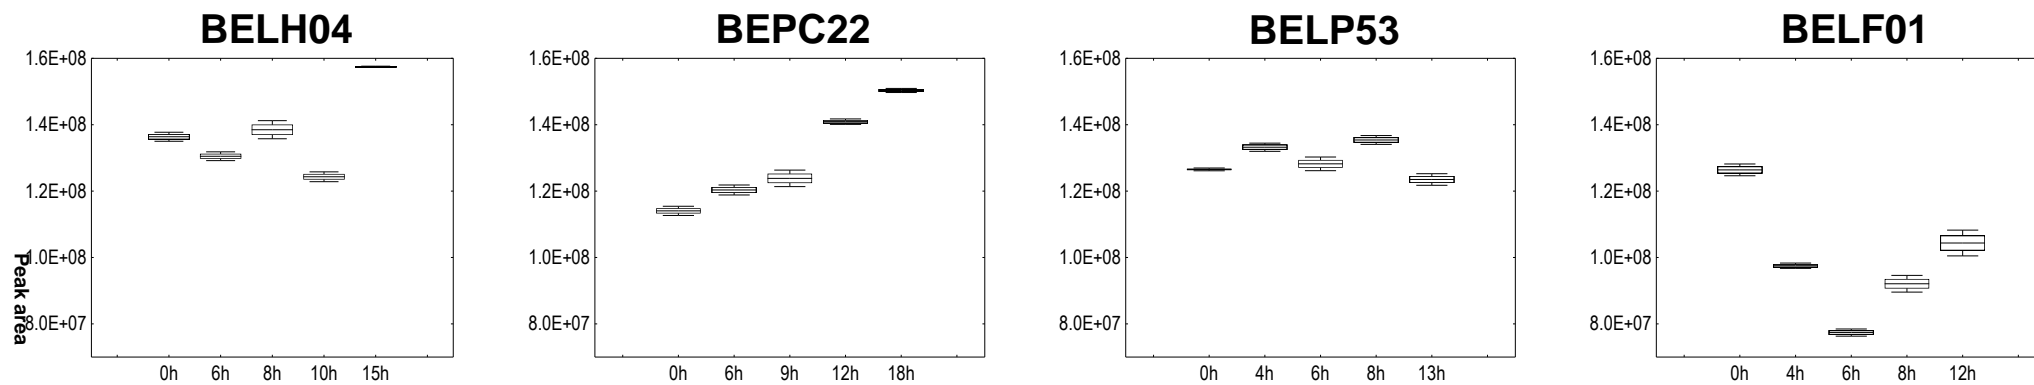

**Tryptophan**

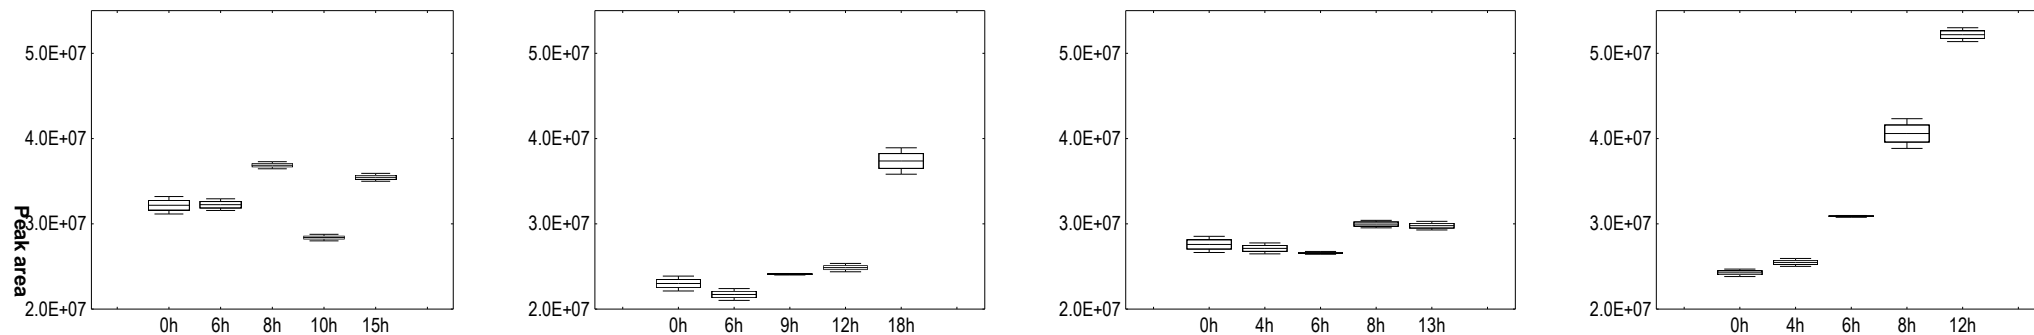

**Glycerol**

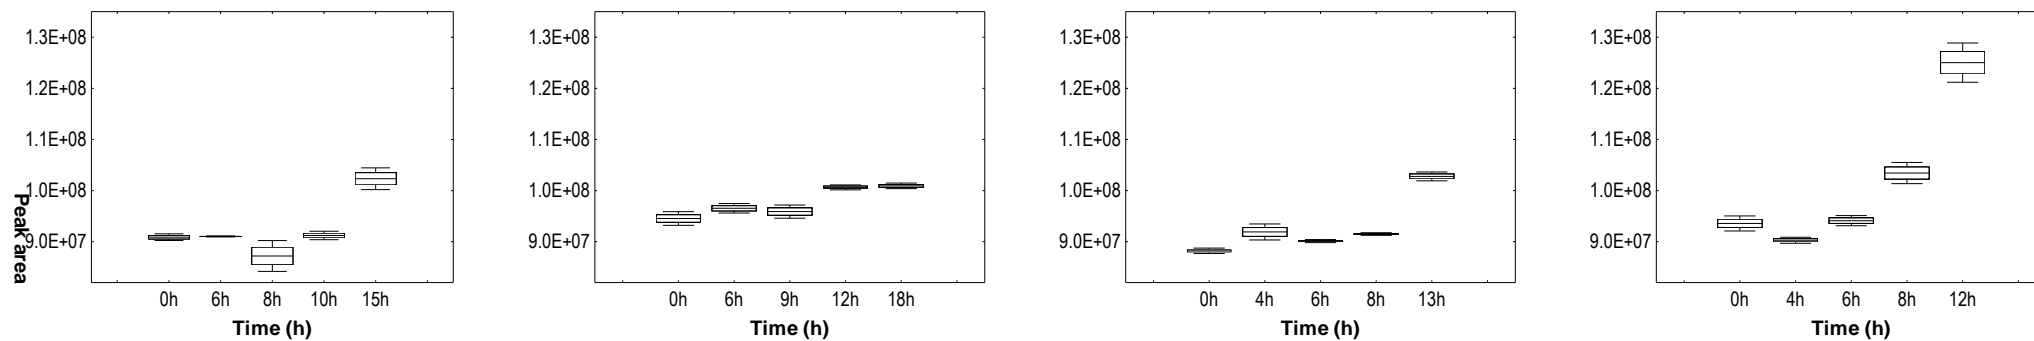

# Electronic Supplementary Information

## BELH04

## BEPC22

## BELP53

## BELF01

### Erythritol

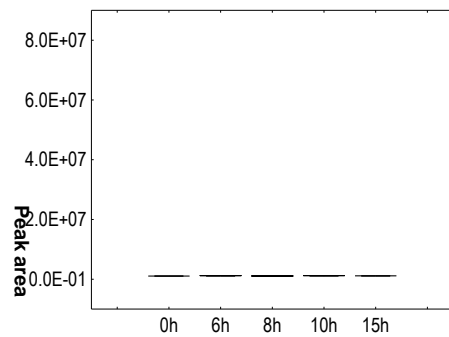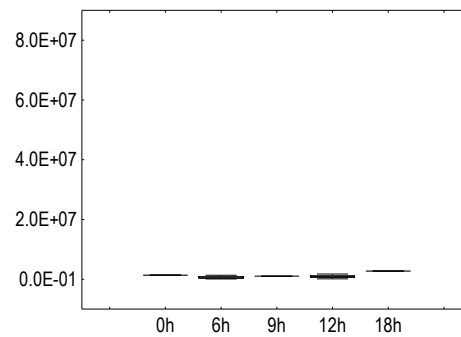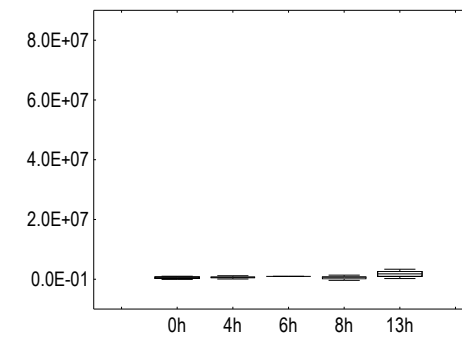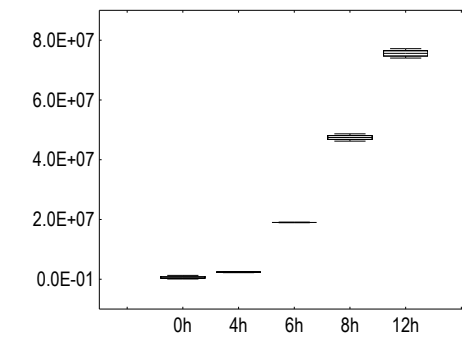

### Fructose

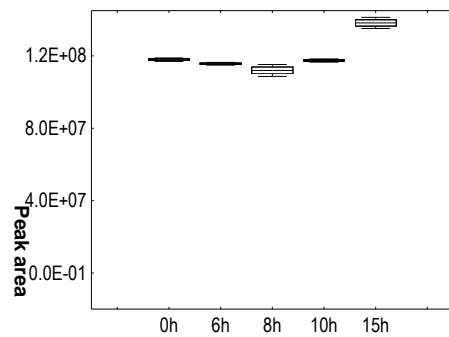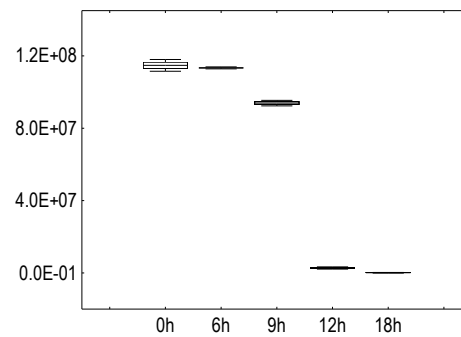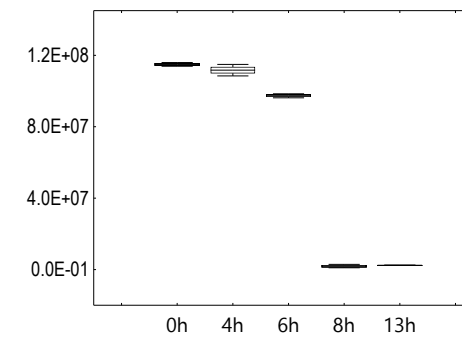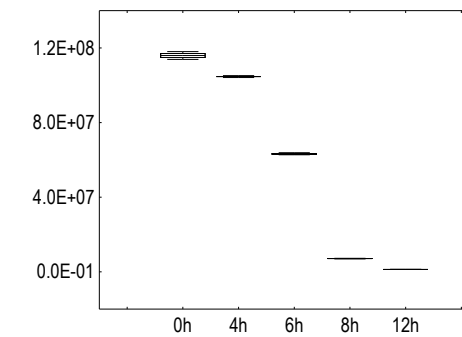

### Glucose

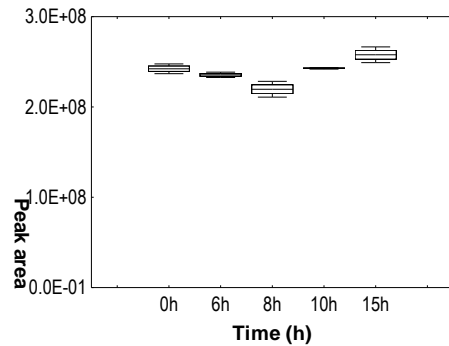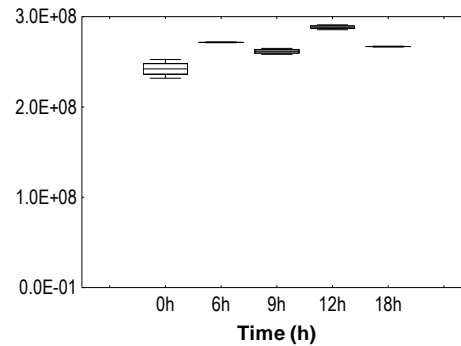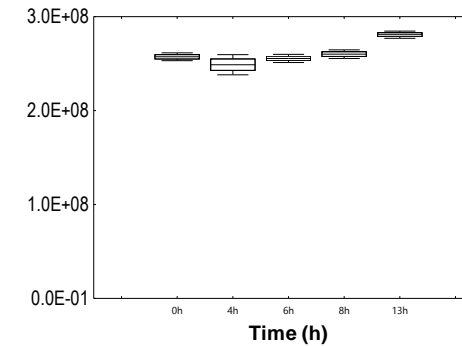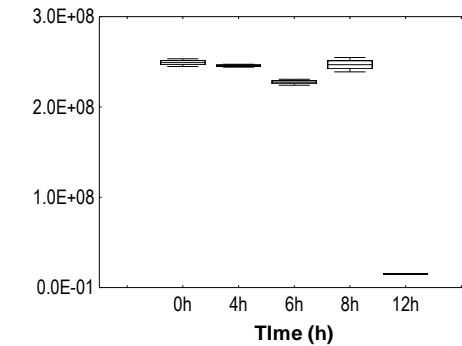

# Electronic Supplementary Information

**Myo-inositol**

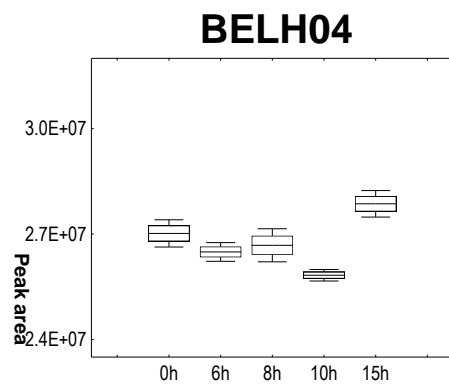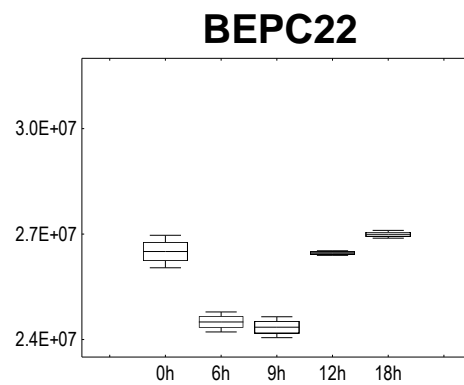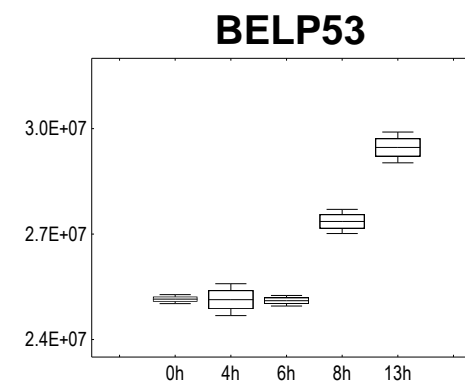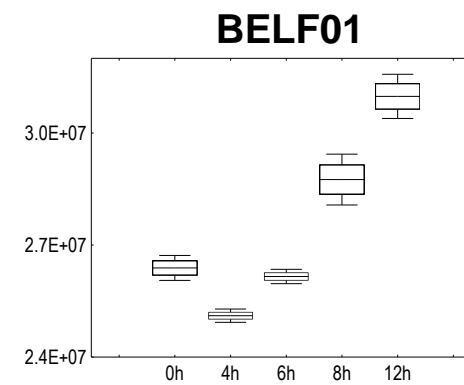

**Lactose**

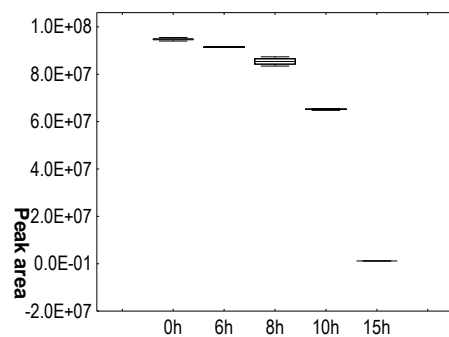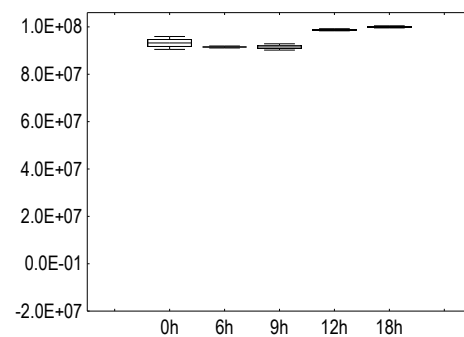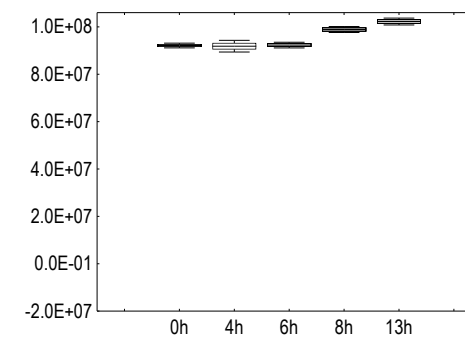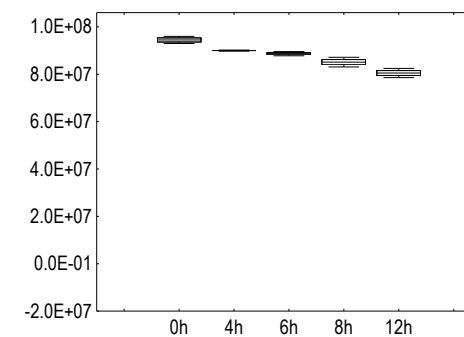

**1,3-Propanediol**

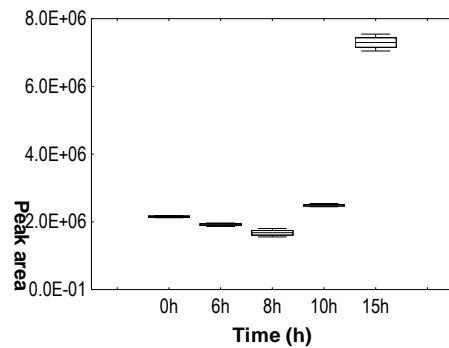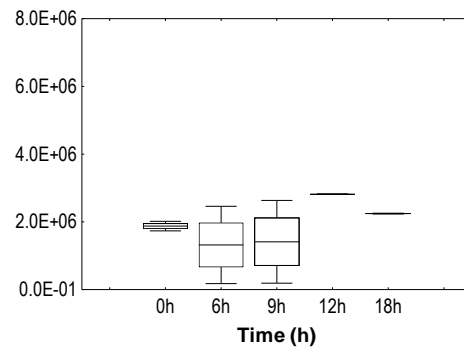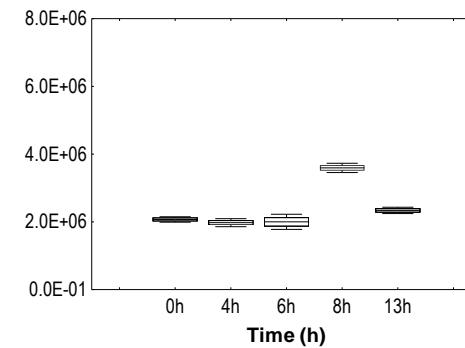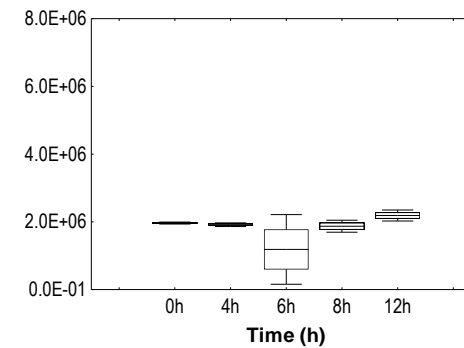

# Electronic Supplementary Information

## BELH04

Hexanoic acid

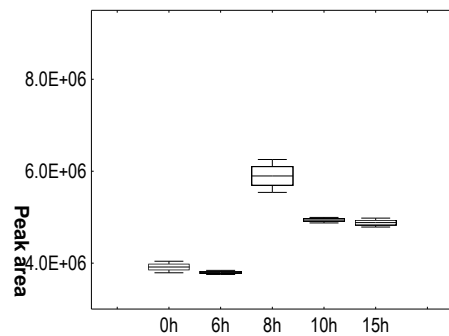

## BEPC22

2-Hydroxy-3-methylbutyric acid

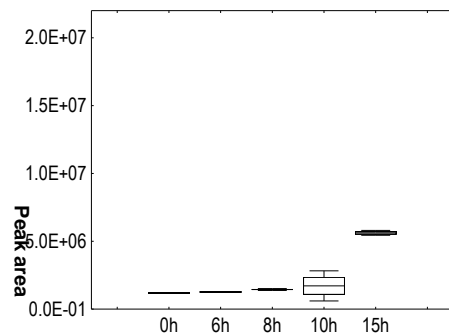

Nonanoic acid

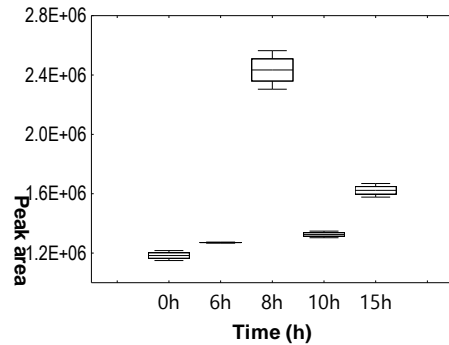

## BELP53

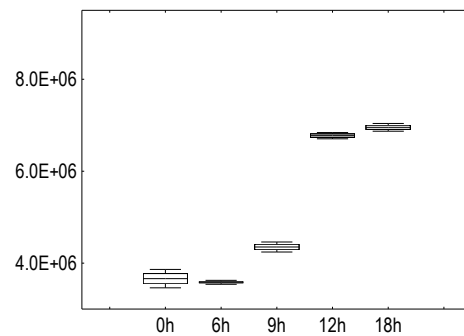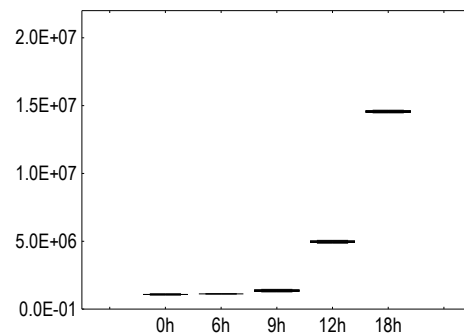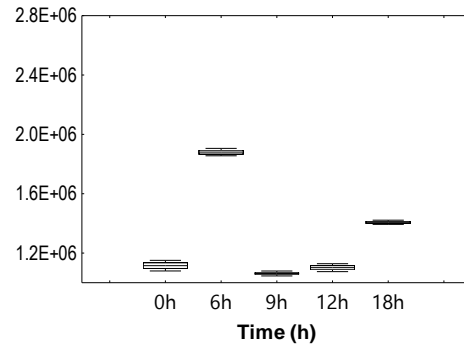

## BELF01

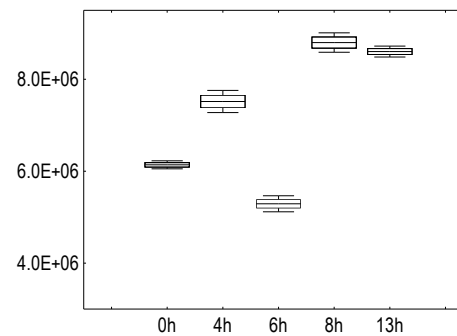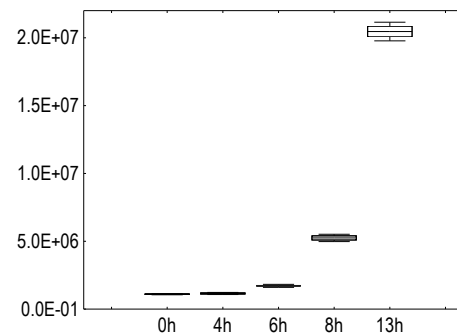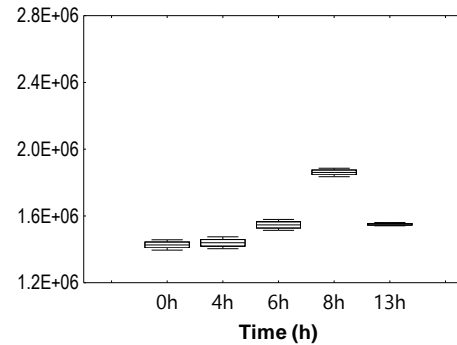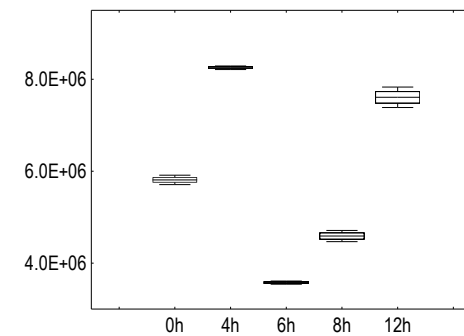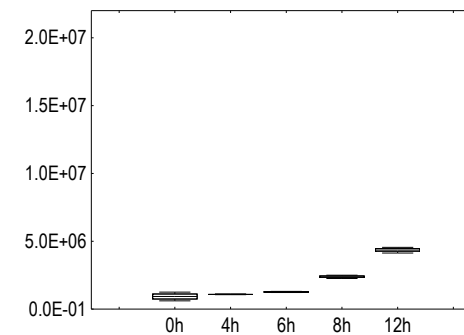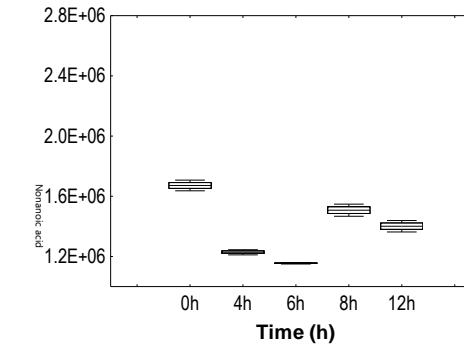

# Electronic Supplementary Information

## BELH04

**4-Aminobutanoic acid**

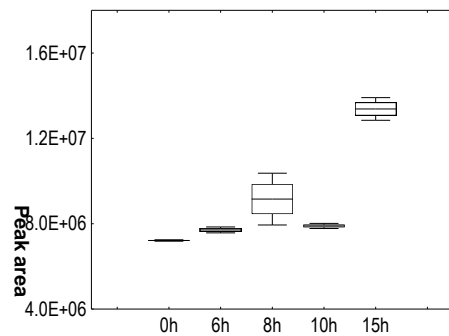

## BEPC22

**Palmitic acid**

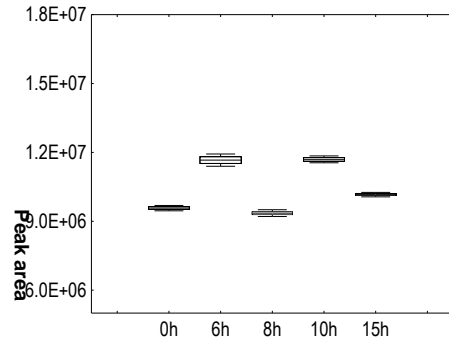

**Oleic acid**

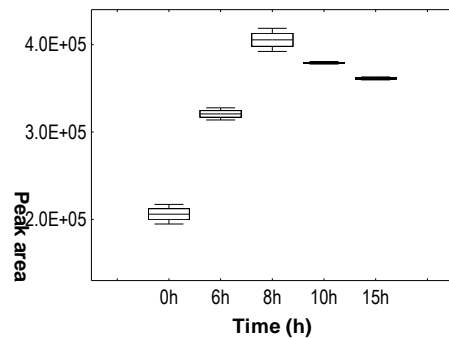

## BELP53

**4-Aminobutanoic acid**

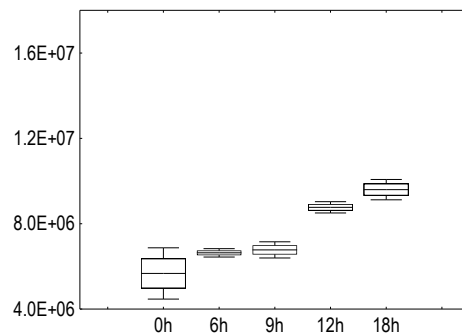

**Palmitic acid**

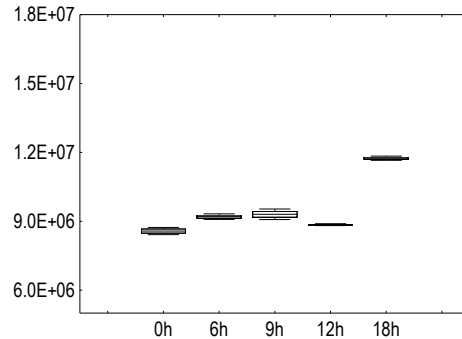

**Oleic acid**

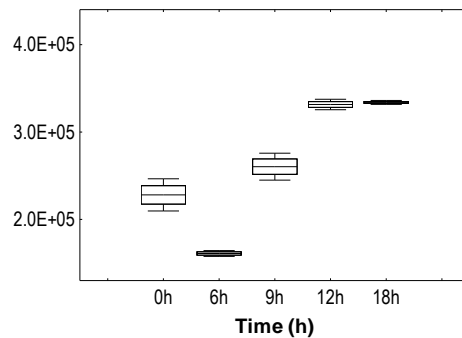

## BELF01

**4-Aminobutanoic acid**

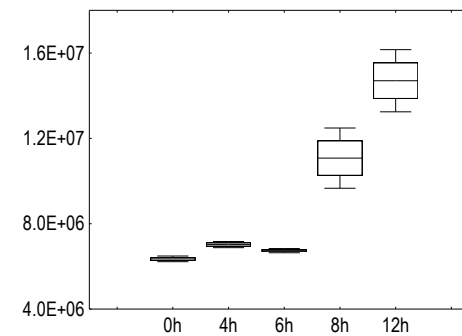

**Palmitic acid**

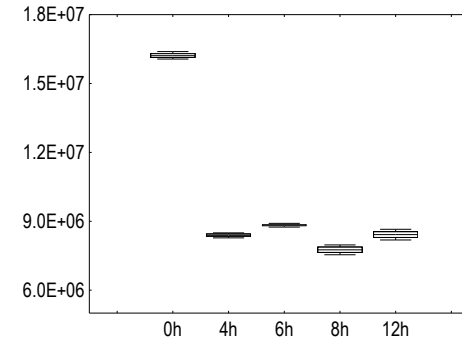

**Oleic acid**

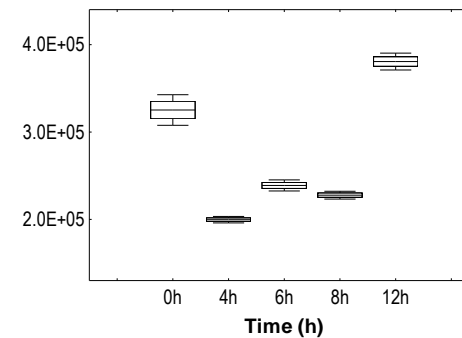



# Electronic Supplementary Information

**Stearic acid**

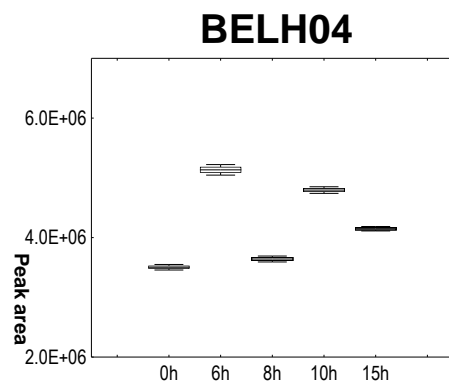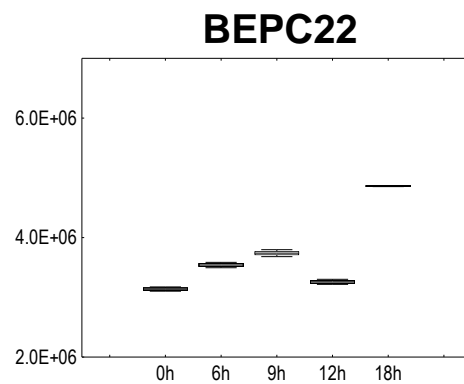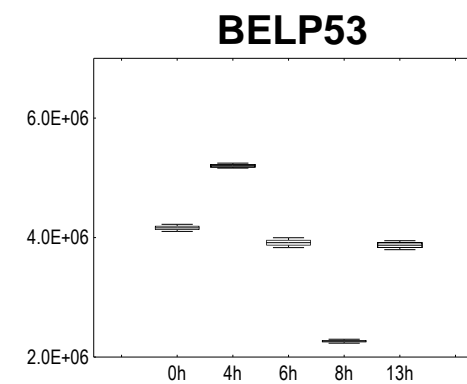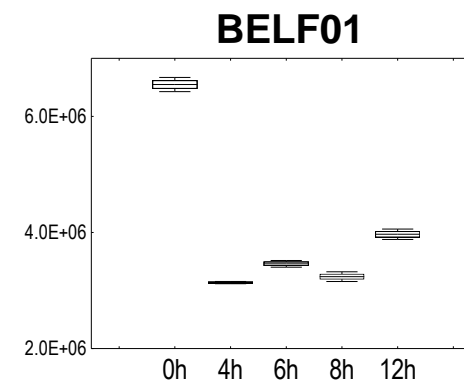

**Oleamide**

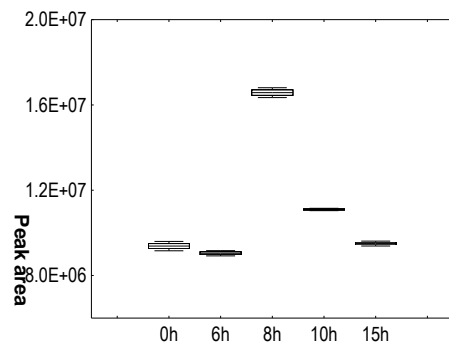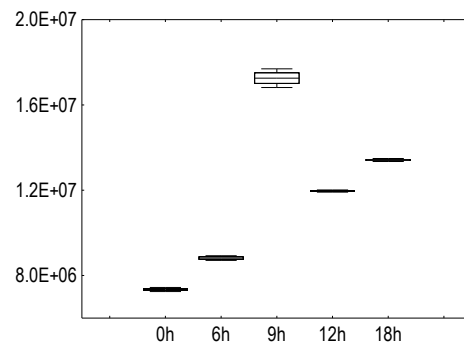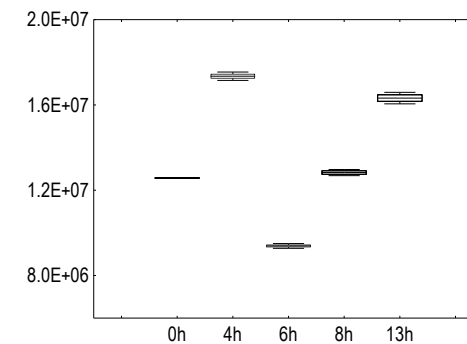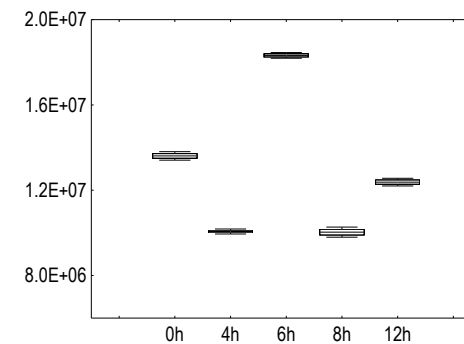

**Palmitoylglycerol**

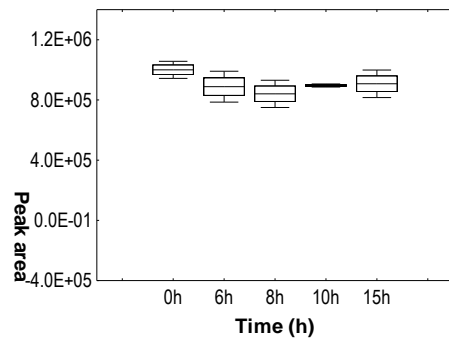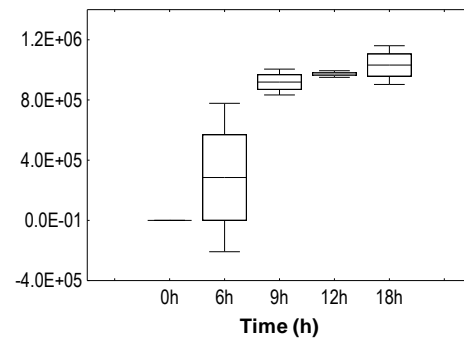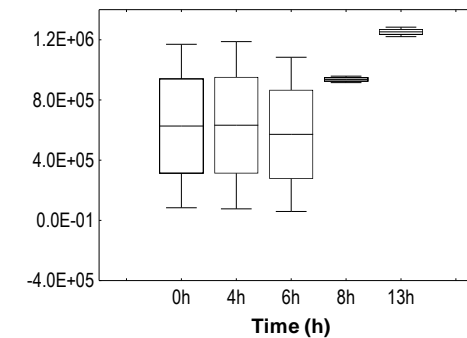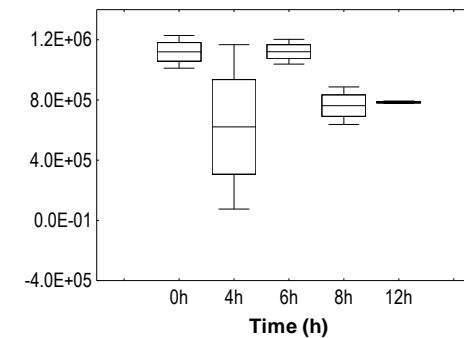

# Electronic Supplementary Information

**Monopalmitin**

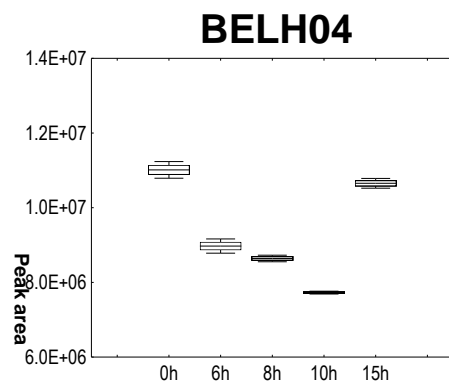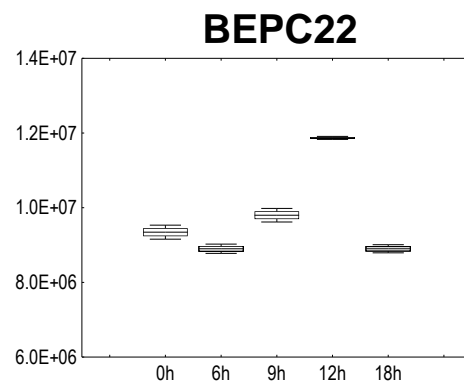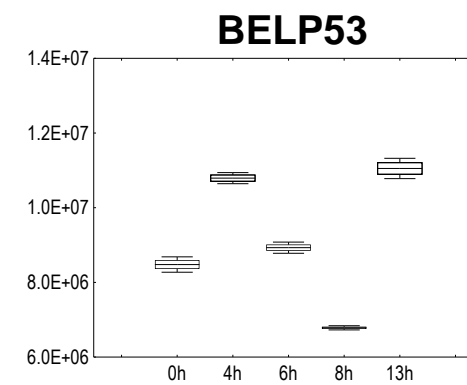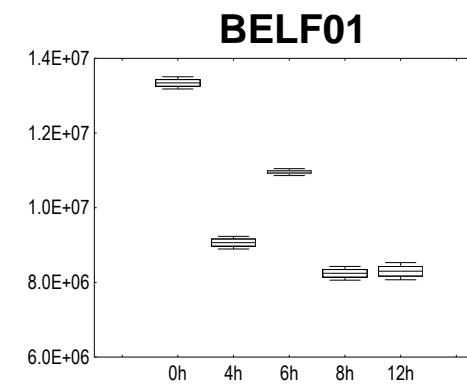

**Glycerol monostearate**

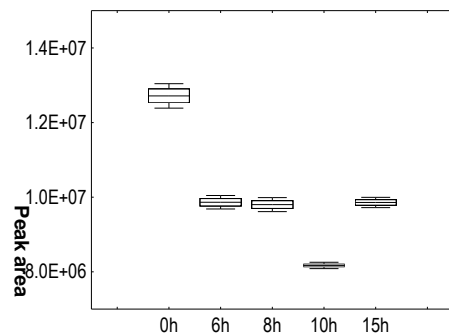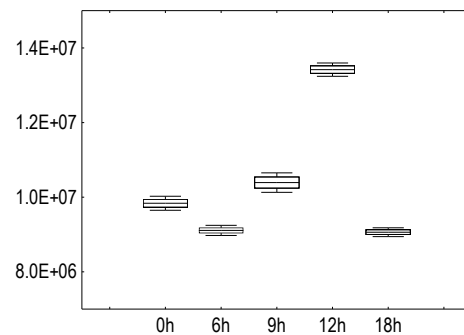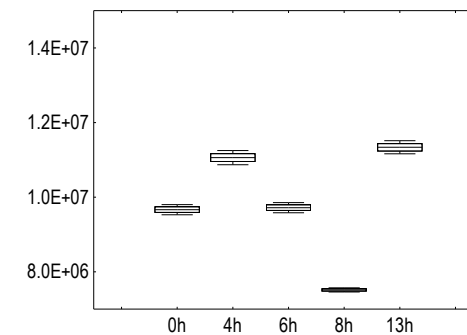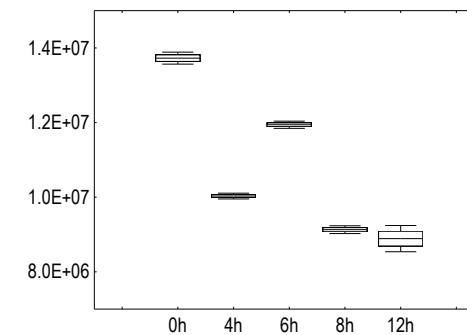

**Uracil**

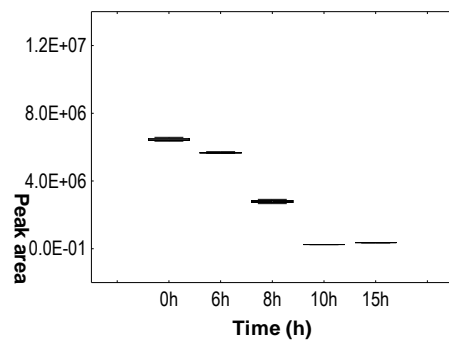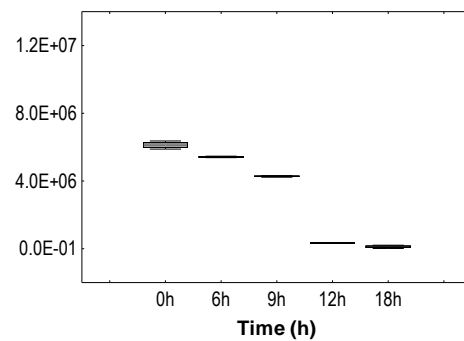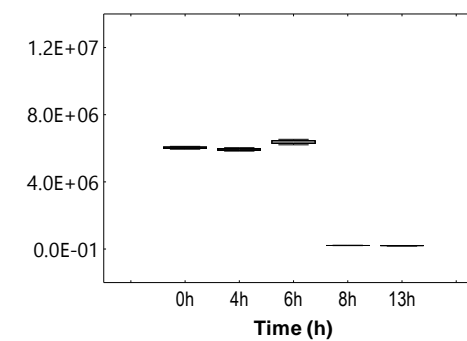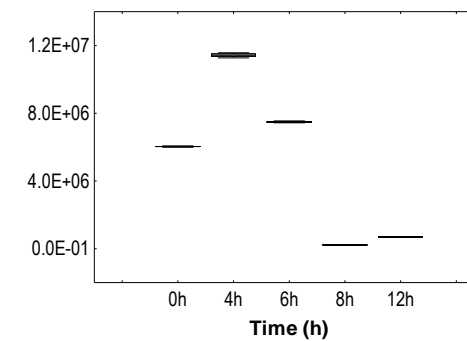

# Electronic Supplementary Information

## BELH04

### Adenine

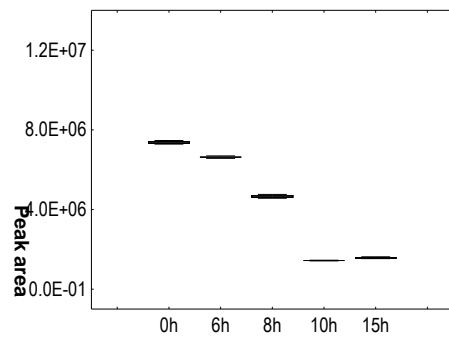

## BEPC22

### Xanthine

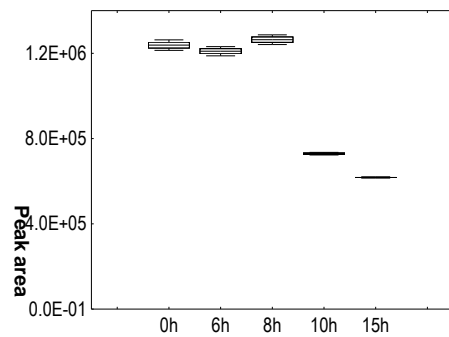

### Adenosine

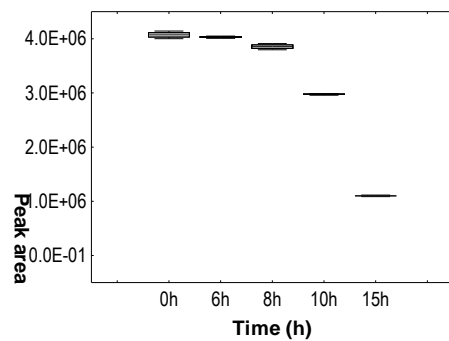

## BELP53

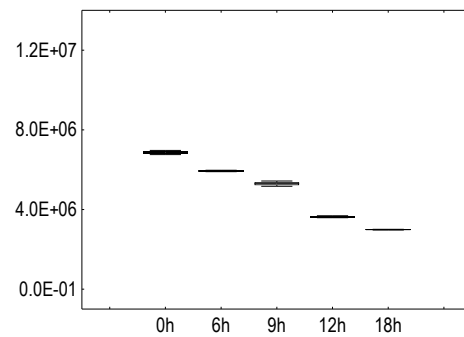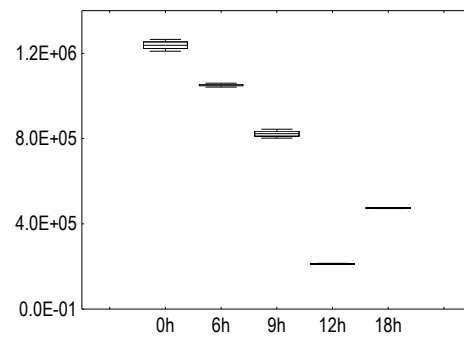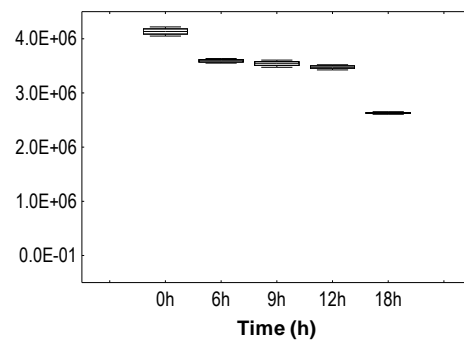

## BELF01

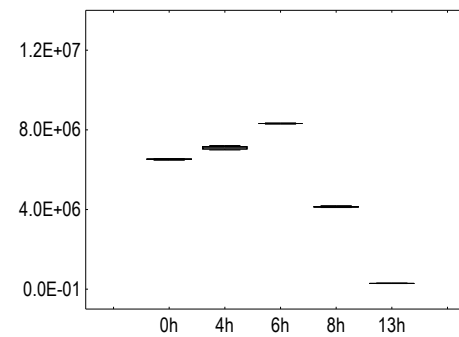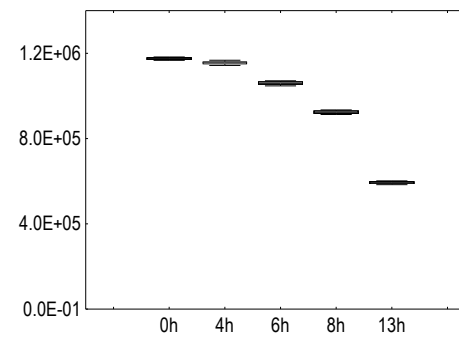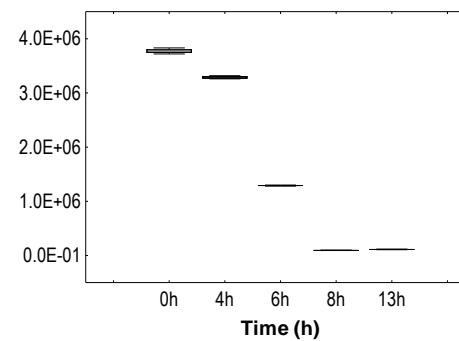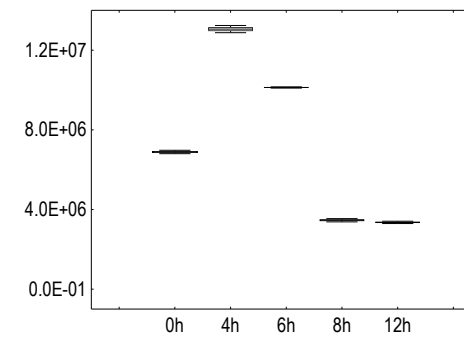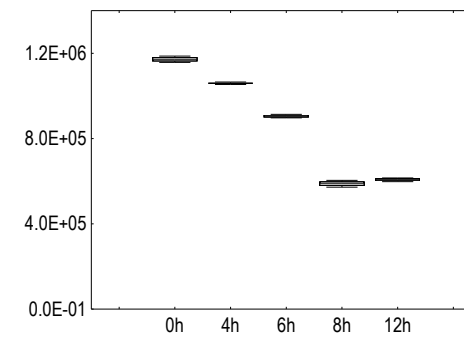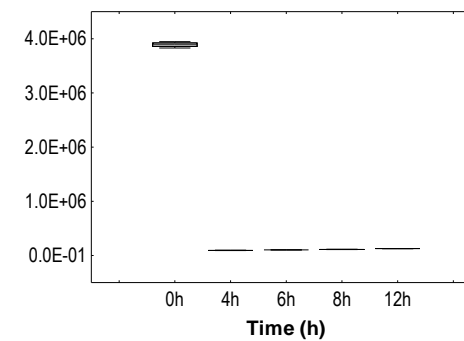

# Electronic Supplementary Information

Ethylene glycol

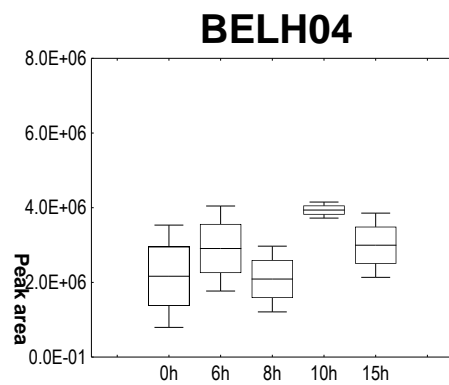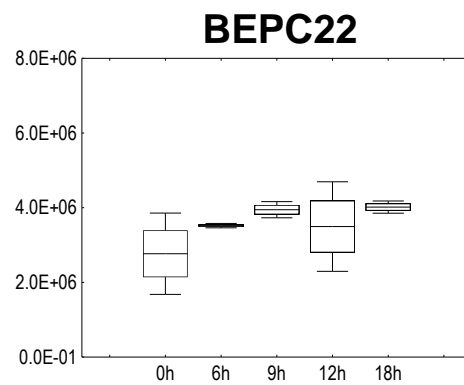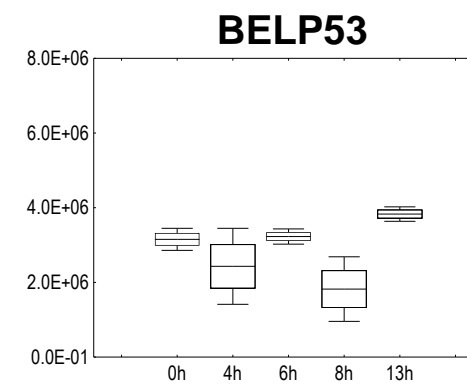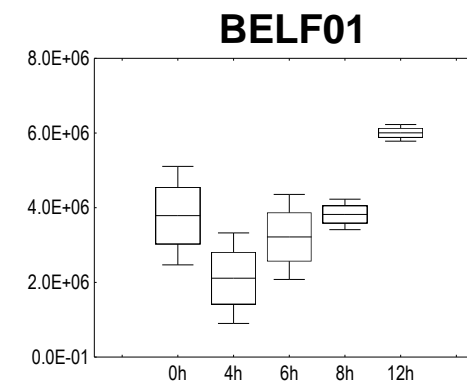

Propylene glycol

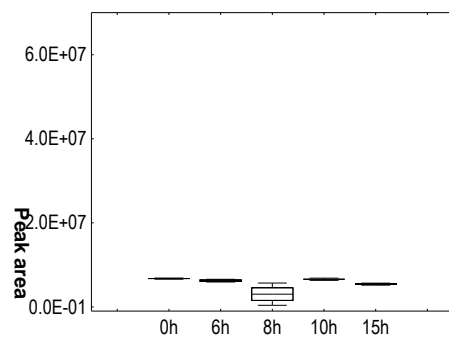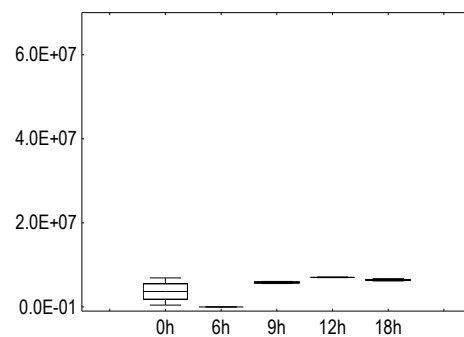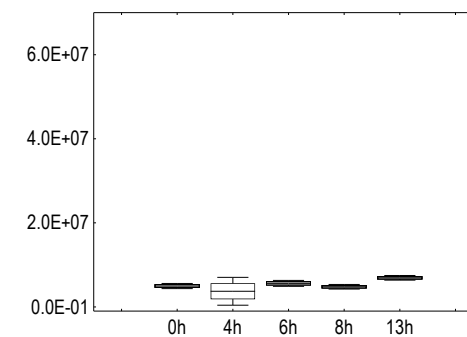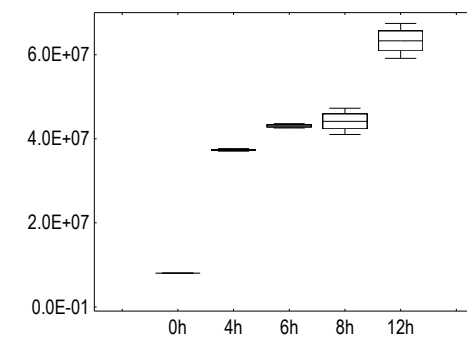

Hydroxylamine

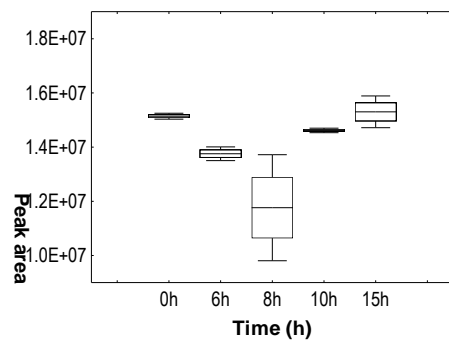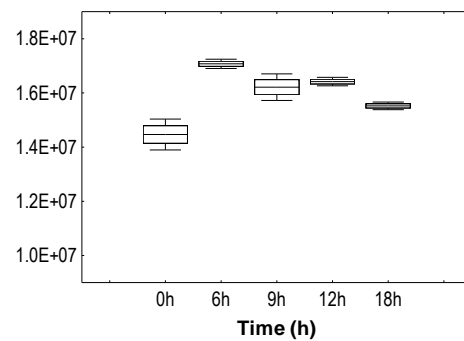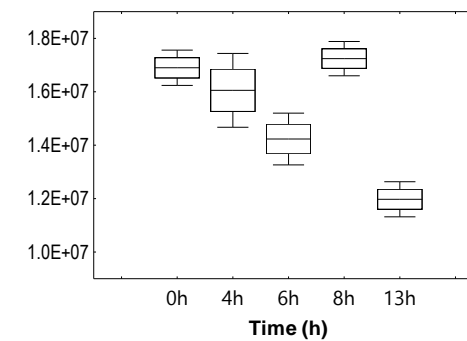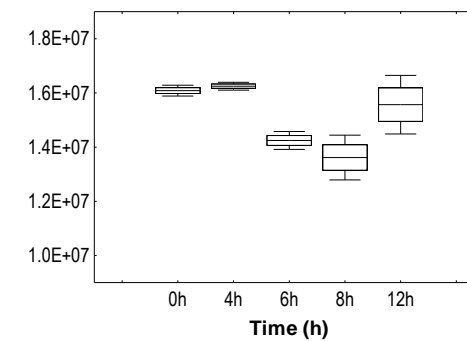

# Electronic Supplementary Information

## BELH04

### Ethanolamine

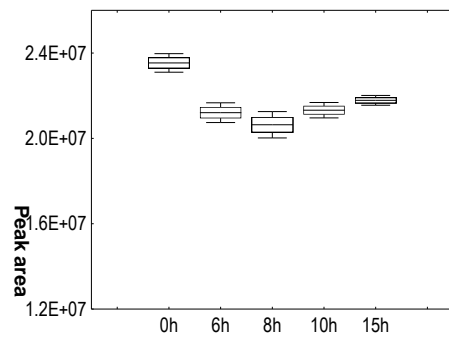

## BEPC22

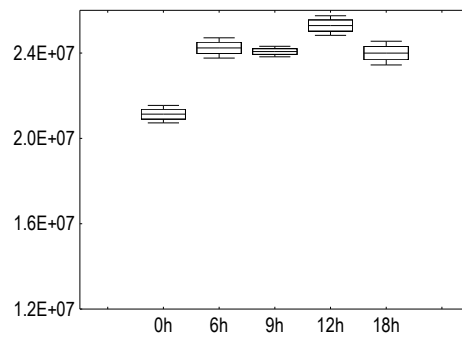

## BELP53

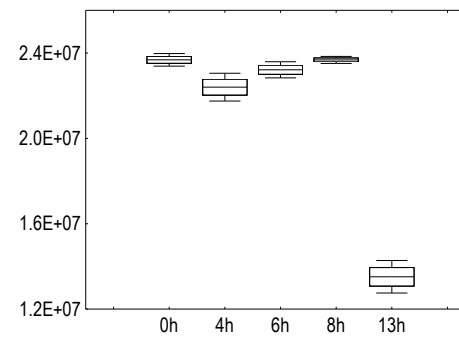

## BELF01

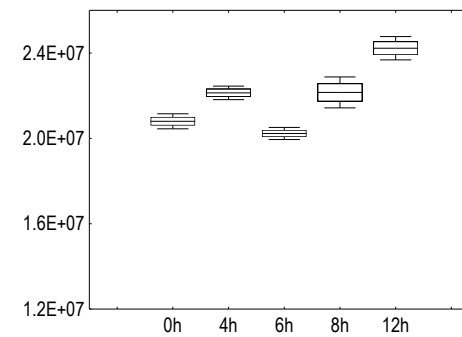

### Benzoic acid

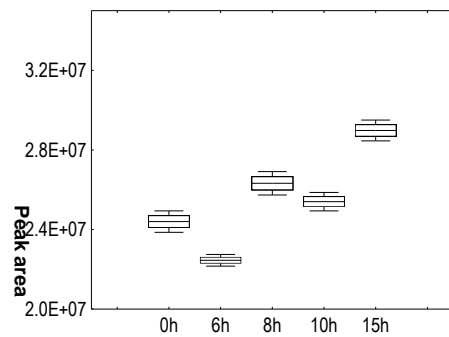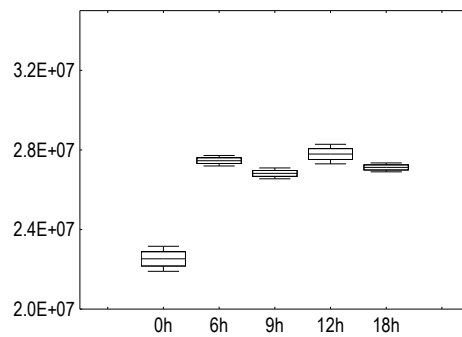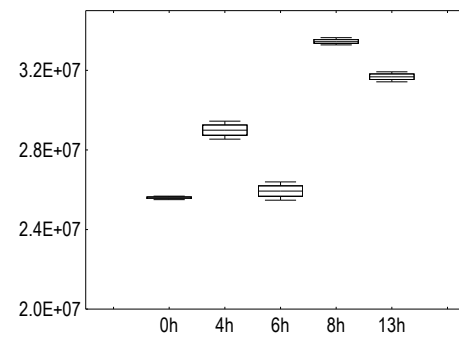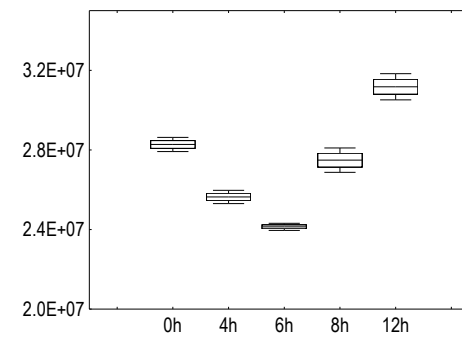

### Toluic acid

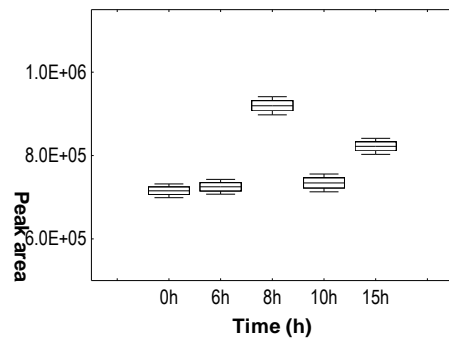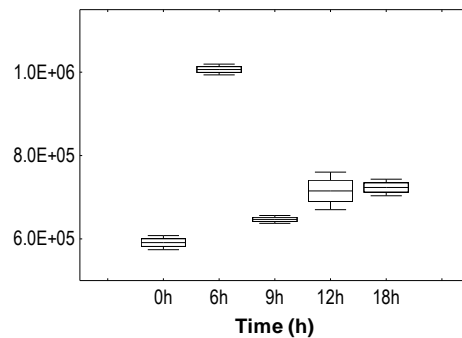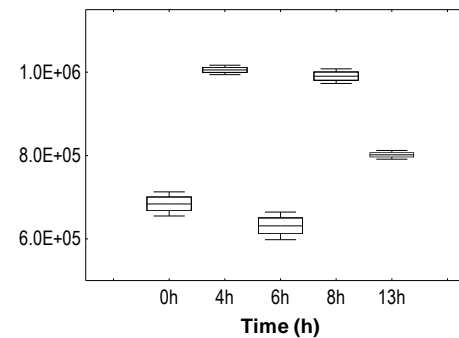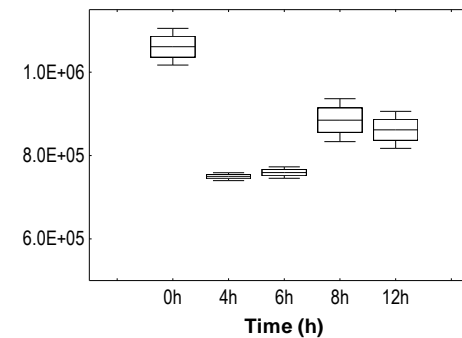

# Electronic Supplementary Information

**2-Naphthol**

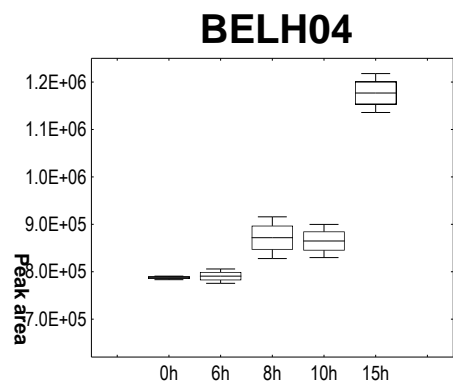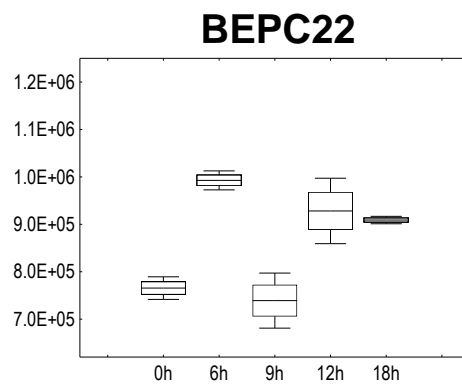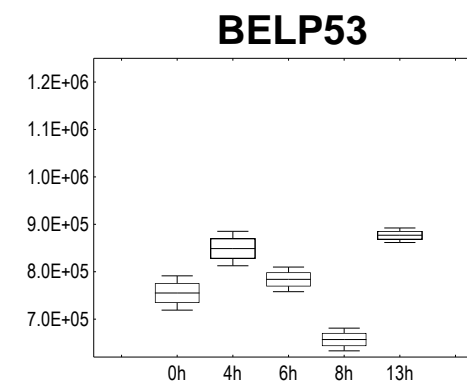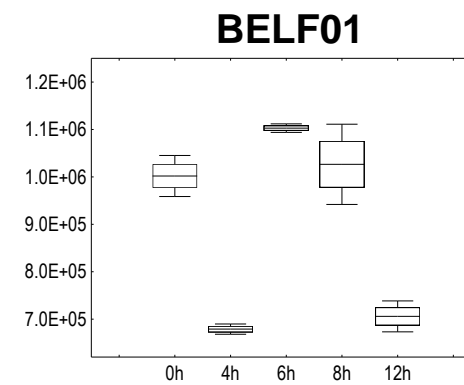

**Phosphoric acid**

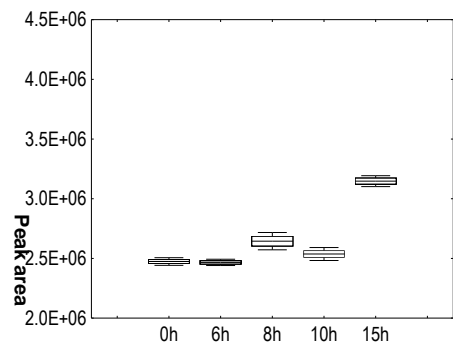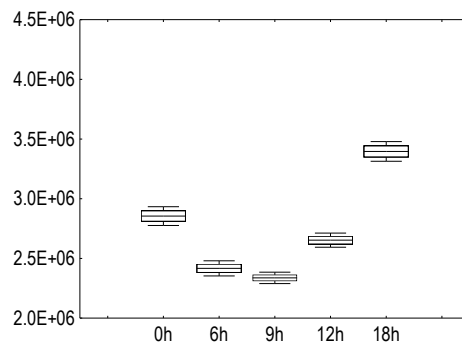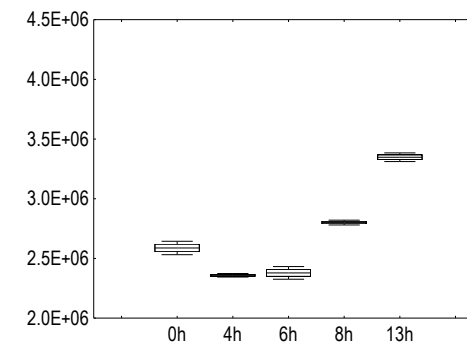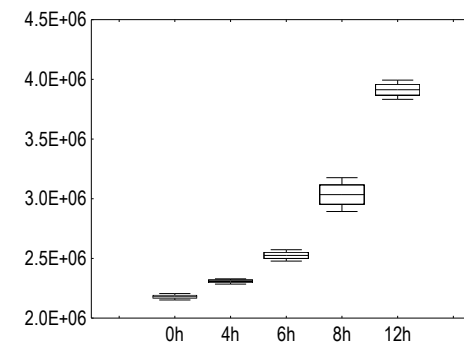

**N.I.1**

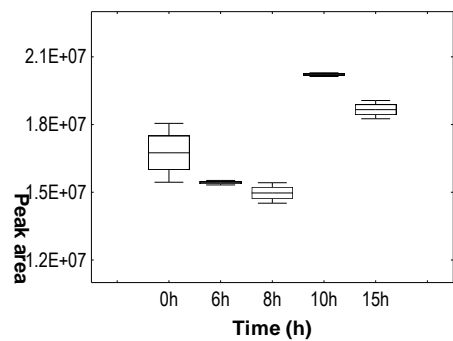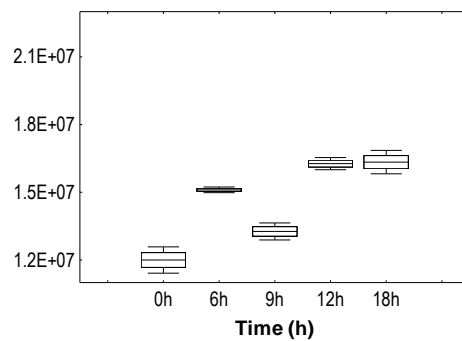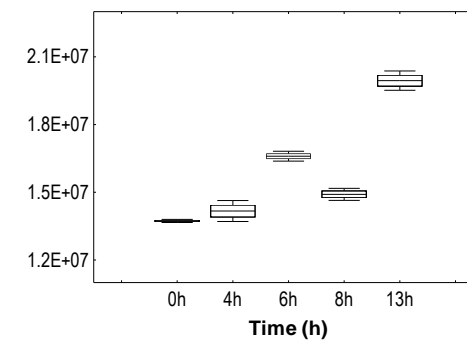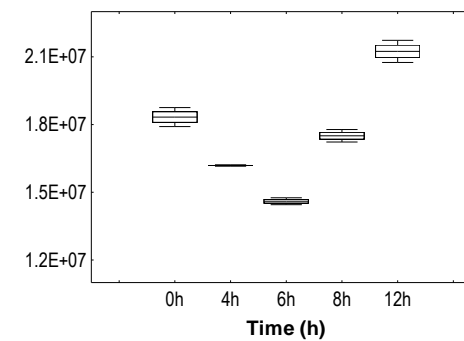

# Electronic Supplementary Information

N.I.2

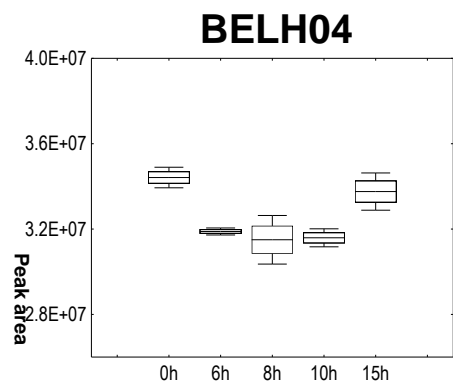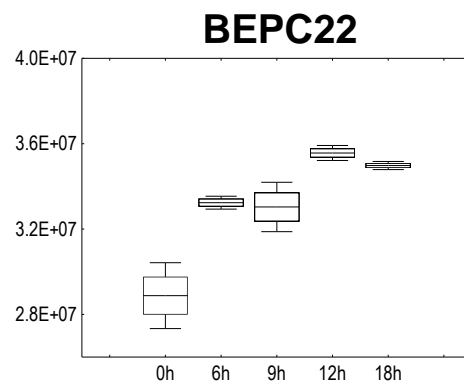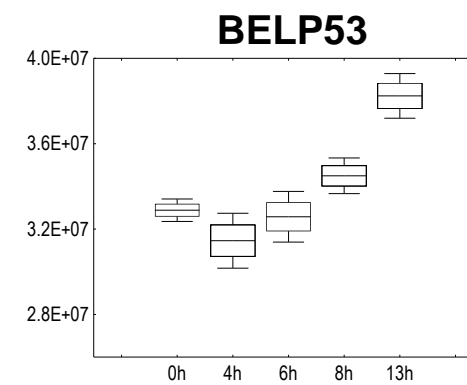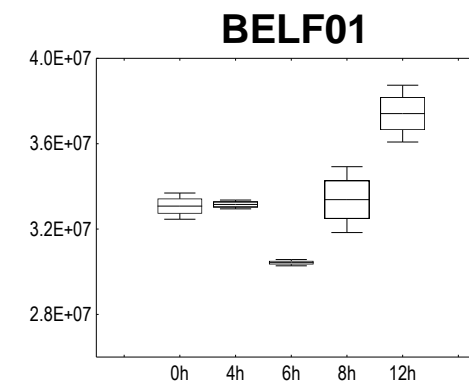

N.I.3

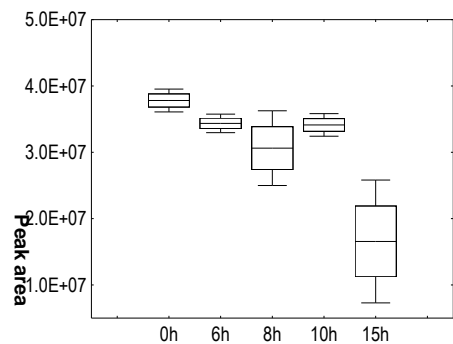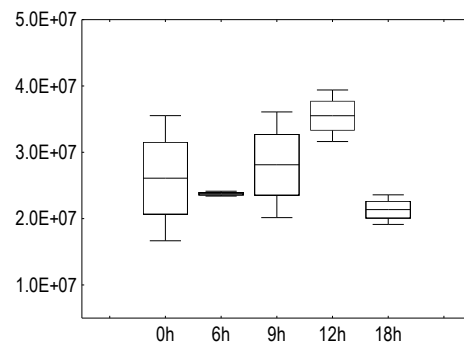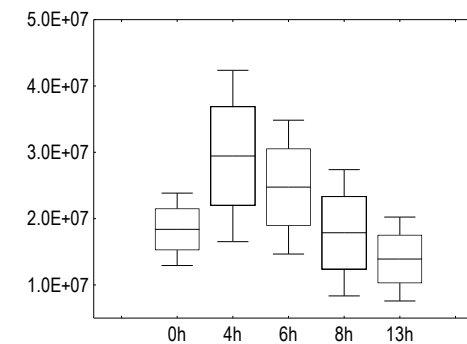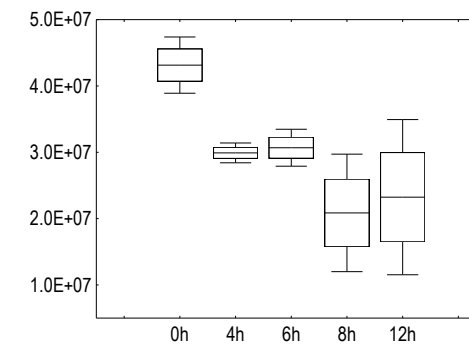

N.I.4

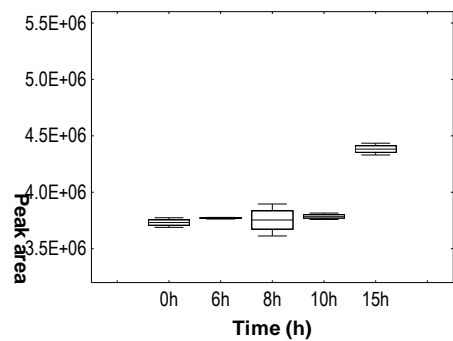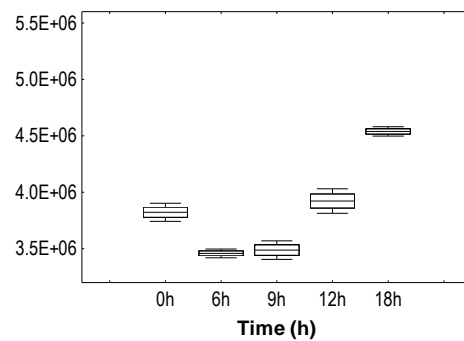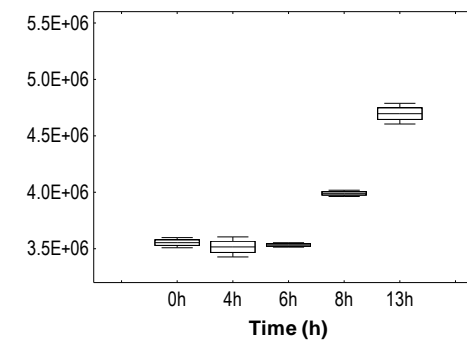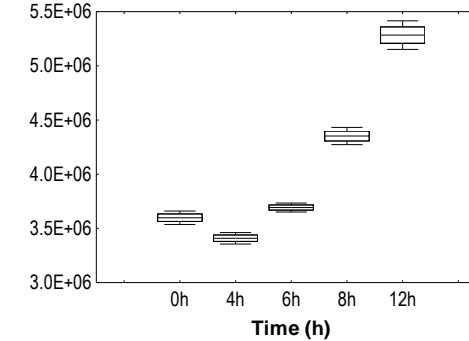

# Electronic Supplementary Information

N.I.5

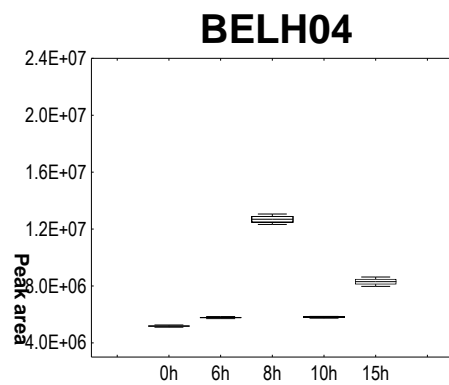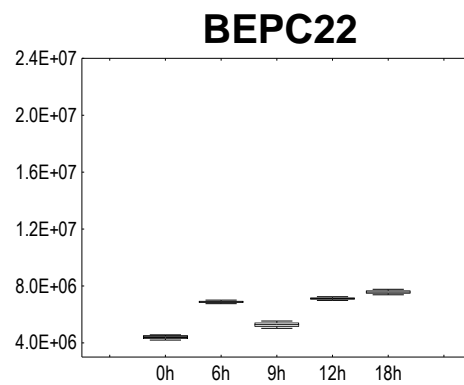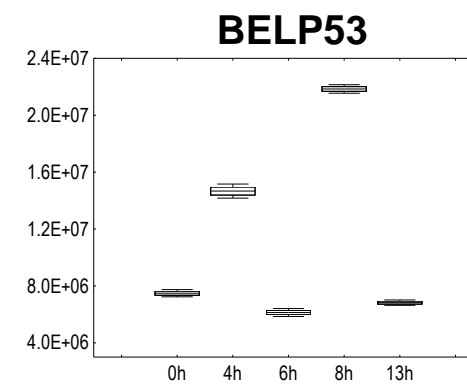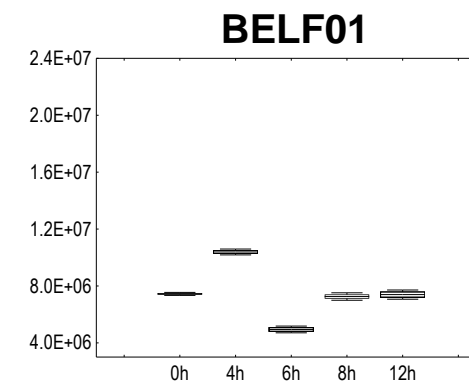

N.I.6

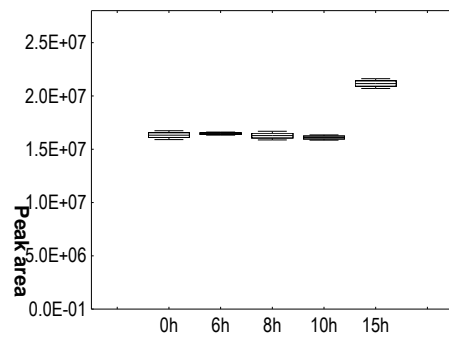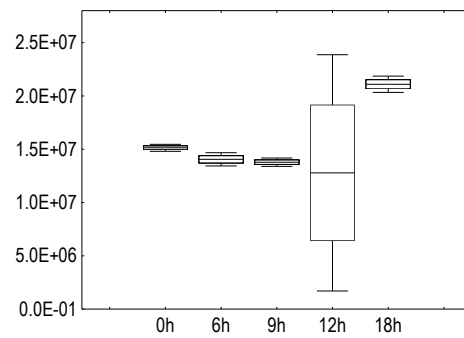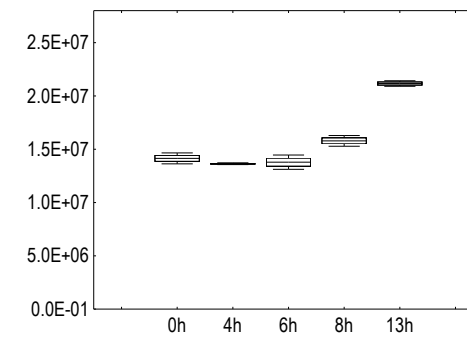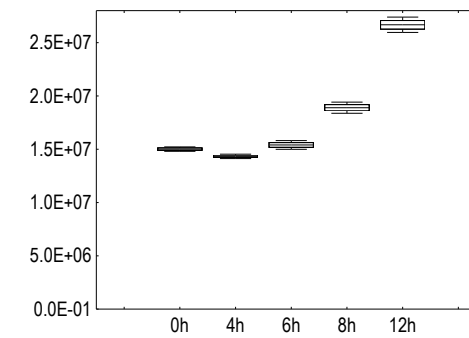

N.I.7

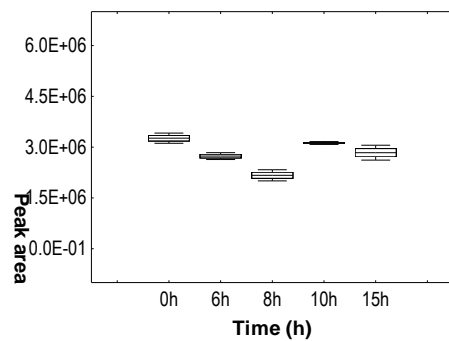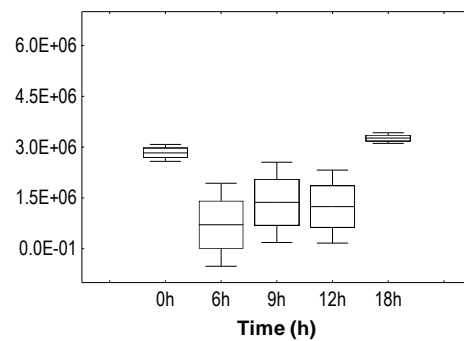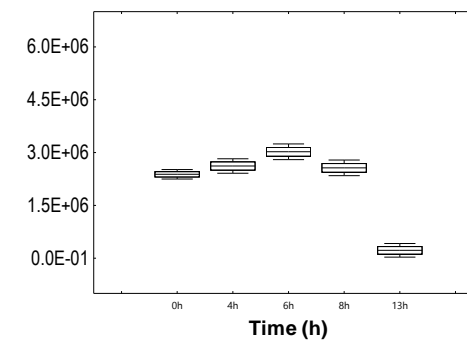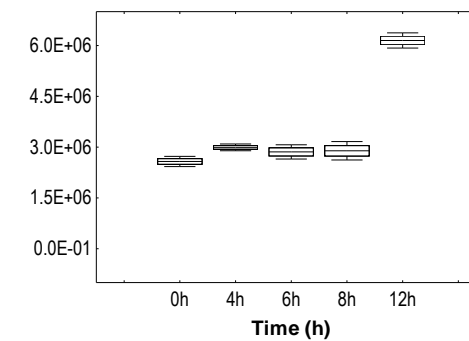



# Electronic Supplementary Information

**N.I.8**

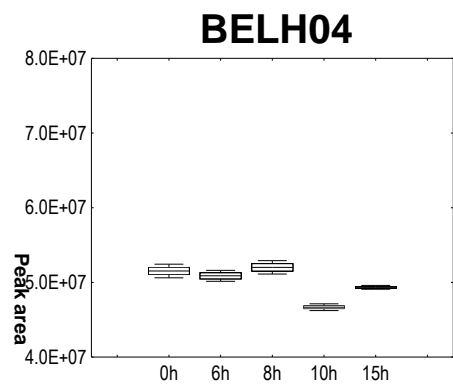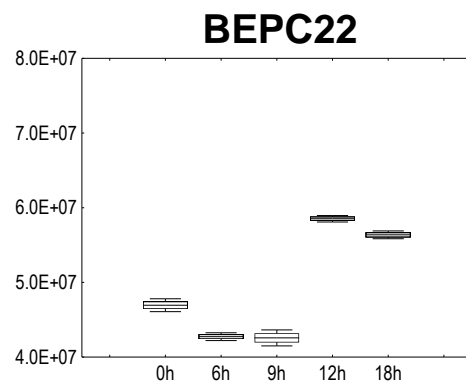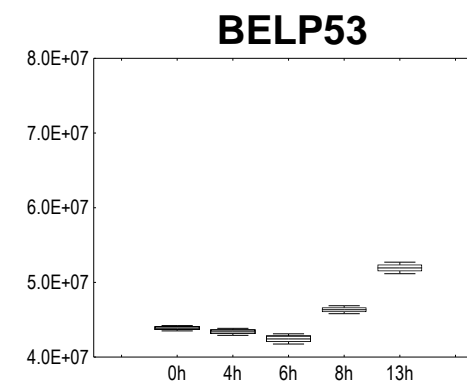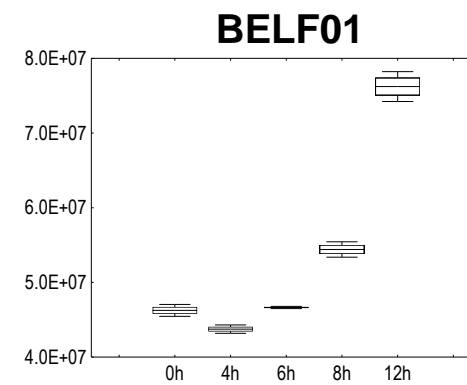

**N.I.9**

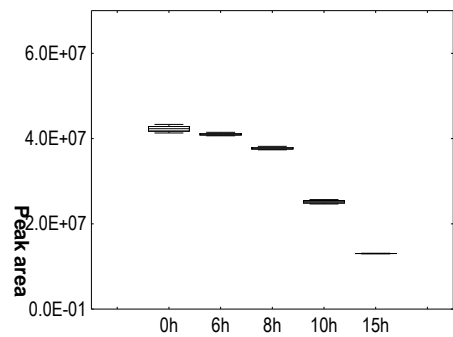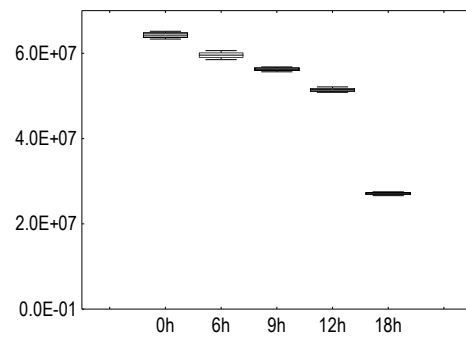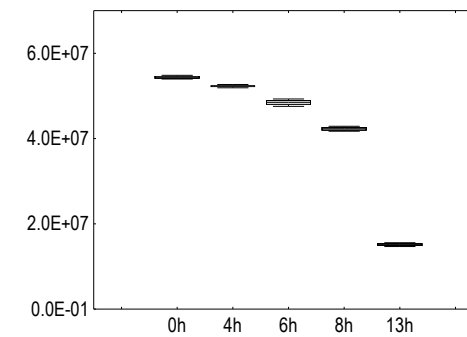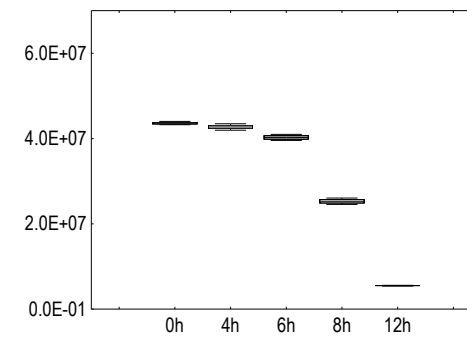

**N.I.10**

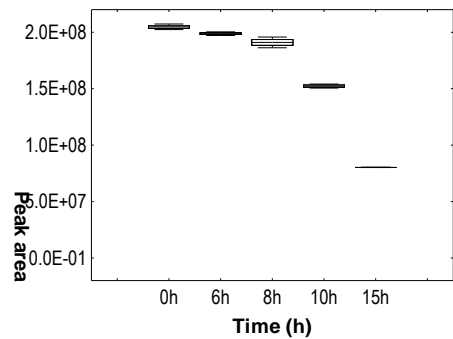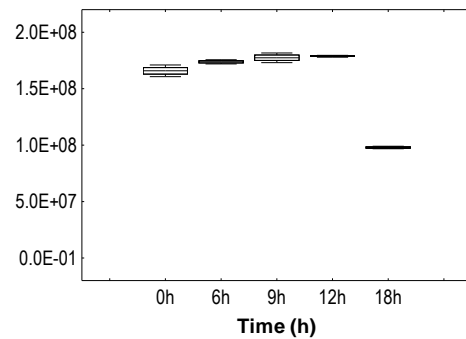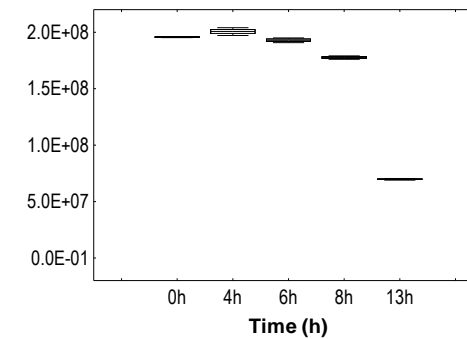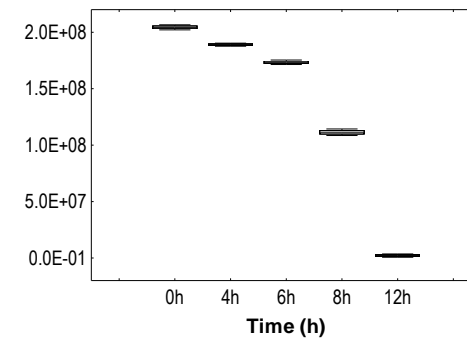

# Electronic Supplementary Information

N.I.11

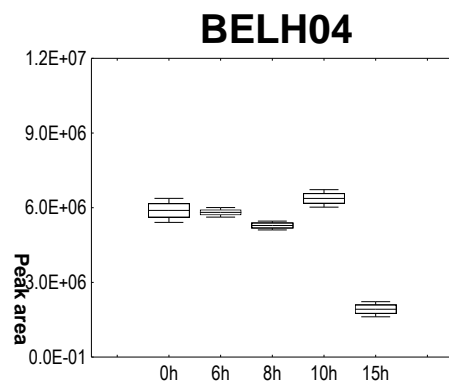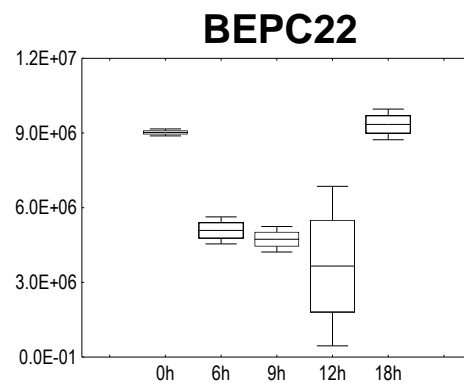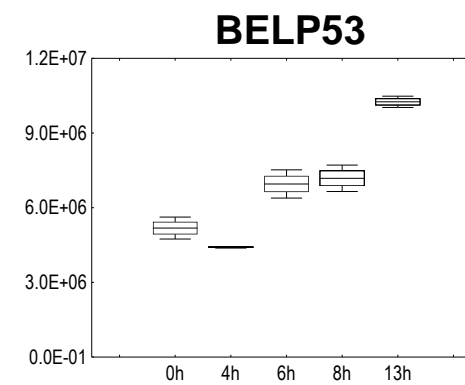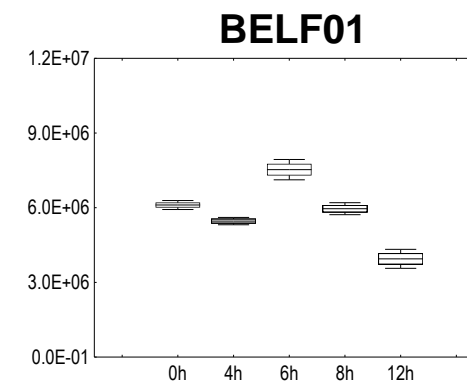

N.I.12

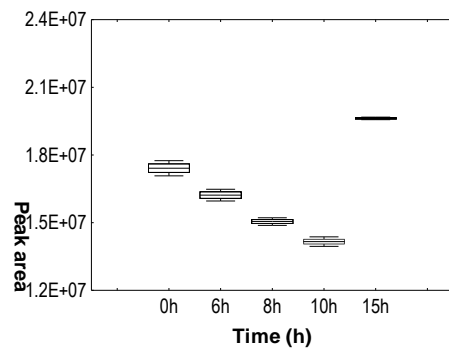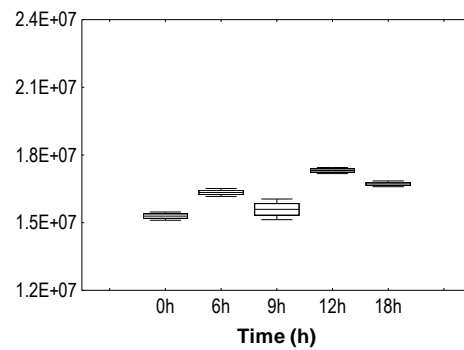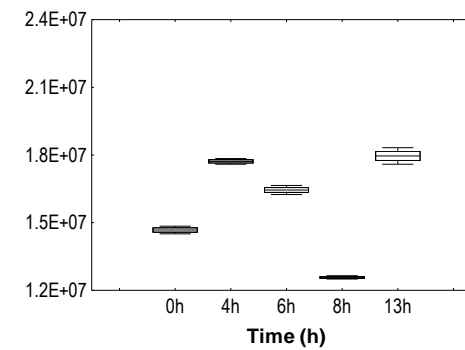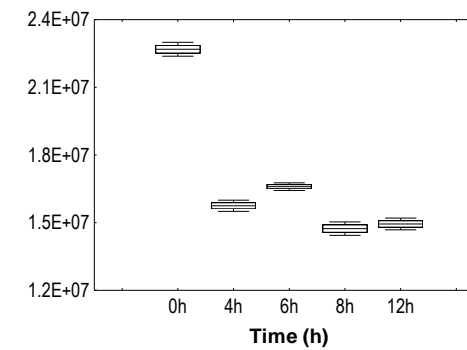

Supplement: d3fo03557c1.pdf [file d3fo03557c1.pdf]
