# Supplementary material for: Combination of Lacticaseibacillus paracasei BEPC22 and Lactiplantibacillus plantarum BELP53 attenuates fat accumulation and alters the metabolome and gut microbiota in mice with high-fat diet-induced obesity
Source: Royal Society of Chemistry journal article supplement (doi:10.1039/d3fo03557c), 2023-12-15
Supplement: d3fo03557c2.pdf [file d3fo03557c2.pdf]

## Supplementary Figures

### A

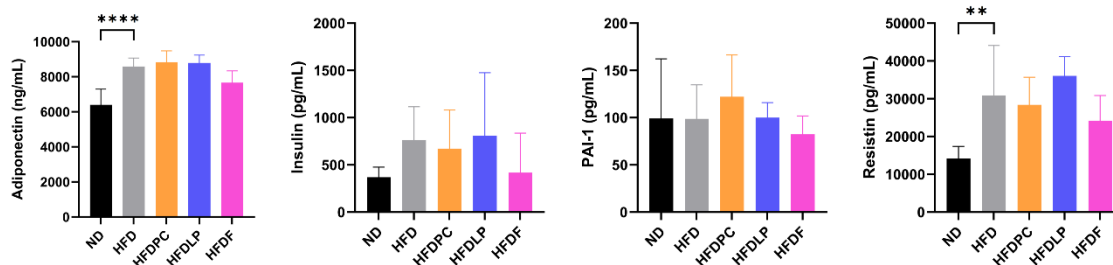

### B

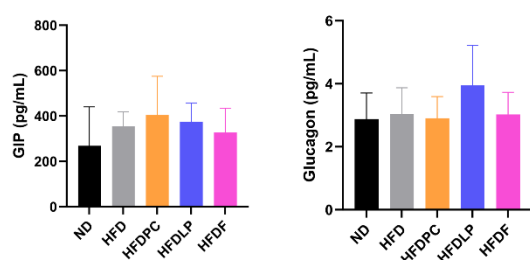

**Supplementary figure 1. Obesity-related hormone level in the plasma of probiotic-administered mice.** (A) Graphs showing the results of quantitative analysis of hormones with decreasing tendency, namely, adiponectin, insulin, PAI-1, and resistin. (B) Graphs showing the results of quantitative analysis of hormones with no change in level, namely, GIP and glucagon. Values represent the mean  $\pm$  SD ( $n = 6$  per group). Significance is indicated by \* $p < 0.05$ , \*\* $p < 0.01$ , \*\*\* $p < 0.001$ , and \*\*\*\* $p < 0.0001$  as compared with the ND group. **HFD**, High fat diet; **HFDPC**, HFD group treated with BEPC22; **HFDL**, HFD group treated with BELP53; **HFDF**, HFD group treated with the combination of two strains.

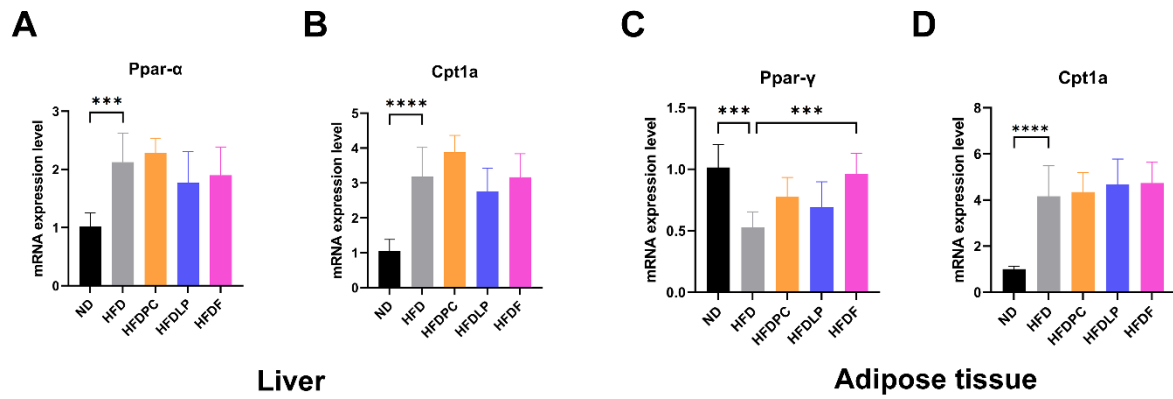

**Supplementary figure 2. mRNA expression of obesity-related genes in the liver and white adipose tissue.** (A–B) Graphs showing results of the qPCR analysis of *Ppar-α* and *Cpt1a* in the liver and (C–E) *Ppar-γ*, *Fasn*, and *Cpt1a* in the epididymal adipose tissue. Values represent the mean  $\pm$  SD (n = 6 per group). Significance is indicated by \* $p < 0.05$ , \*\* $p < 0.01$ , \*\*\* $p < 0.001$ , and \*\*\*\* $p < 0.0001$  as compared with the ND group. *BEPC22*, *Lactocaseibacillus paracasei*; *BELP53*, *Lactiplantibacillus plantarum*; *Ppar-α* or  $\gamma$ , Peroxisome proliferator-activated receptor alpha or gamma; *Ucp2*, Uncoupling protein2; *Fasn*, Fatty acid synthase; *Cpt1a*, Carnitine palmitoyltransferase1a.

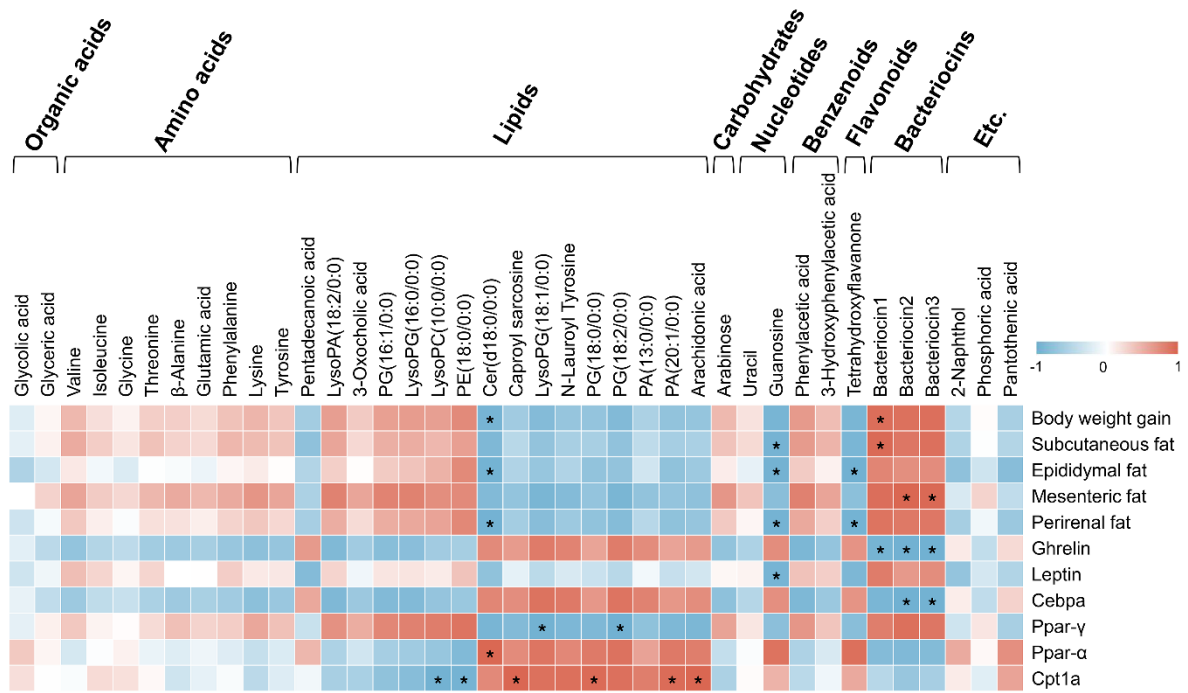

**Supplementary figure 3. Correlation map between the metabolite levels of faeces and observed mouse phenotypes.** Each square implies Pearson's correlation coefficient between metabolites and assayed activities. Red indicates a positive ( $0 < r < 1$ ) correlation, and blue indicates a negative ( $-1 < r < 0$ ) correlation. Asterisks indicate  $p$ -values  $< 0.05$ .

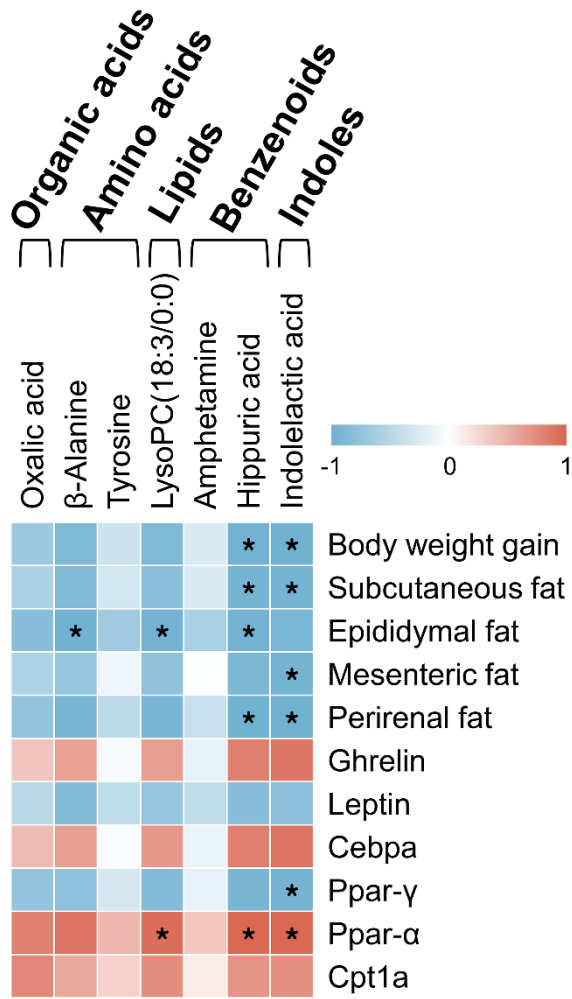

**Supplementary figure 4. Correlation map between the metabolite levels of plasma and observed mouse phenotypes.** Each square implies Pearson's correlation coefficient between metabolites and assayed activities. Red indicates a positive ( $0 < r < 1$ ) correlation, and blue indicates a negative ( $-1 < r < 0$ ) correlation. Asterisks indicate  $p$ -values  $< 0.05$ .

**A**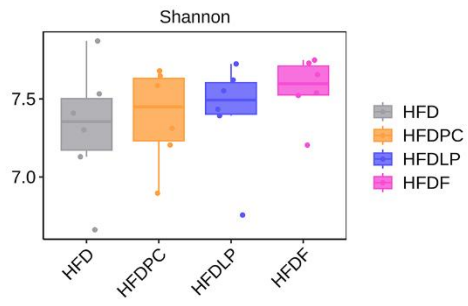**B**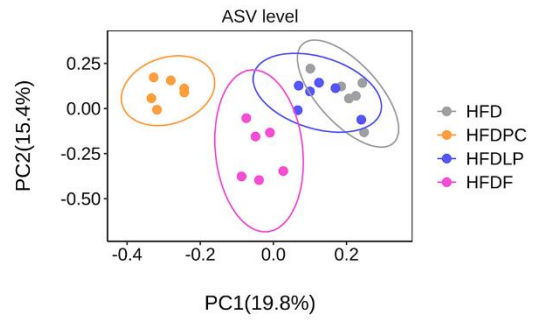

**Supplementary figure 5. Comparison of the gut microbiota diversity between the groups.** Alpha diversity comparisons using (A) the Shannon index. Beta diversity at (B) the ASV level as revealed by principal component analysis.

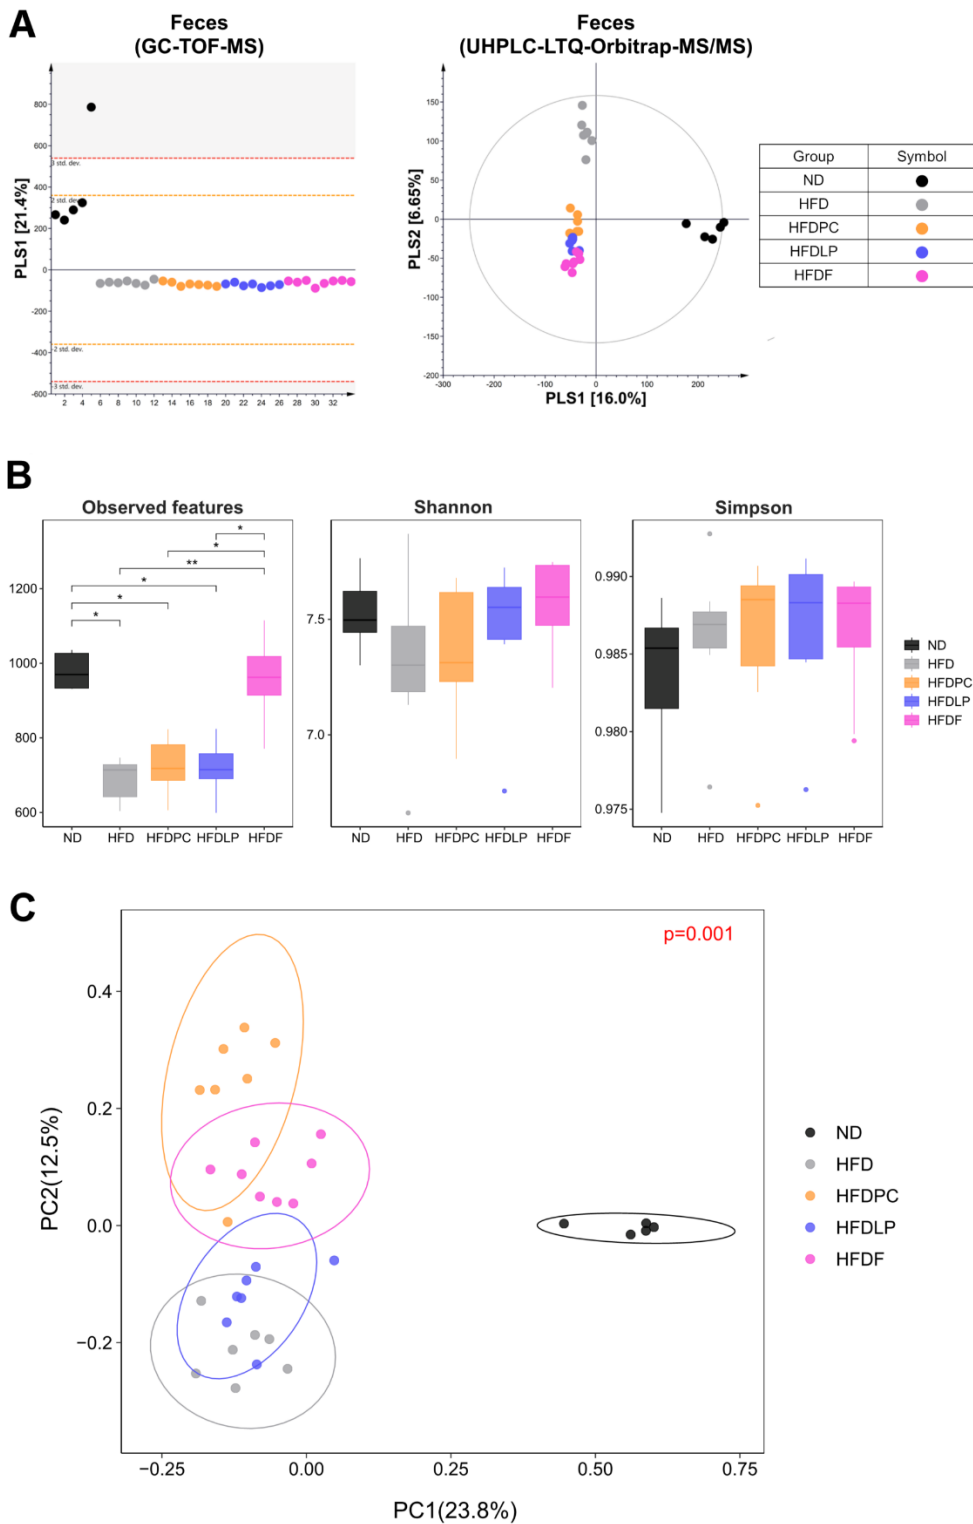

**Supplementary figure 6. Comparison of the gut microbiota diversity between the groups including ND group.** Sparse partial least-squares discriminant analysis (PLS-DA) score plots for the metabolome of faeces five groups based on GC-TOF-MS and UHPLC-LTQ-Orbitrap-MS/MS data sets (A). Alpha diversity comparisons using (B) the Observed features, Shannon index and Simpson index. Beta diversity at (C) the ASV level as revealed by principal component analysis.

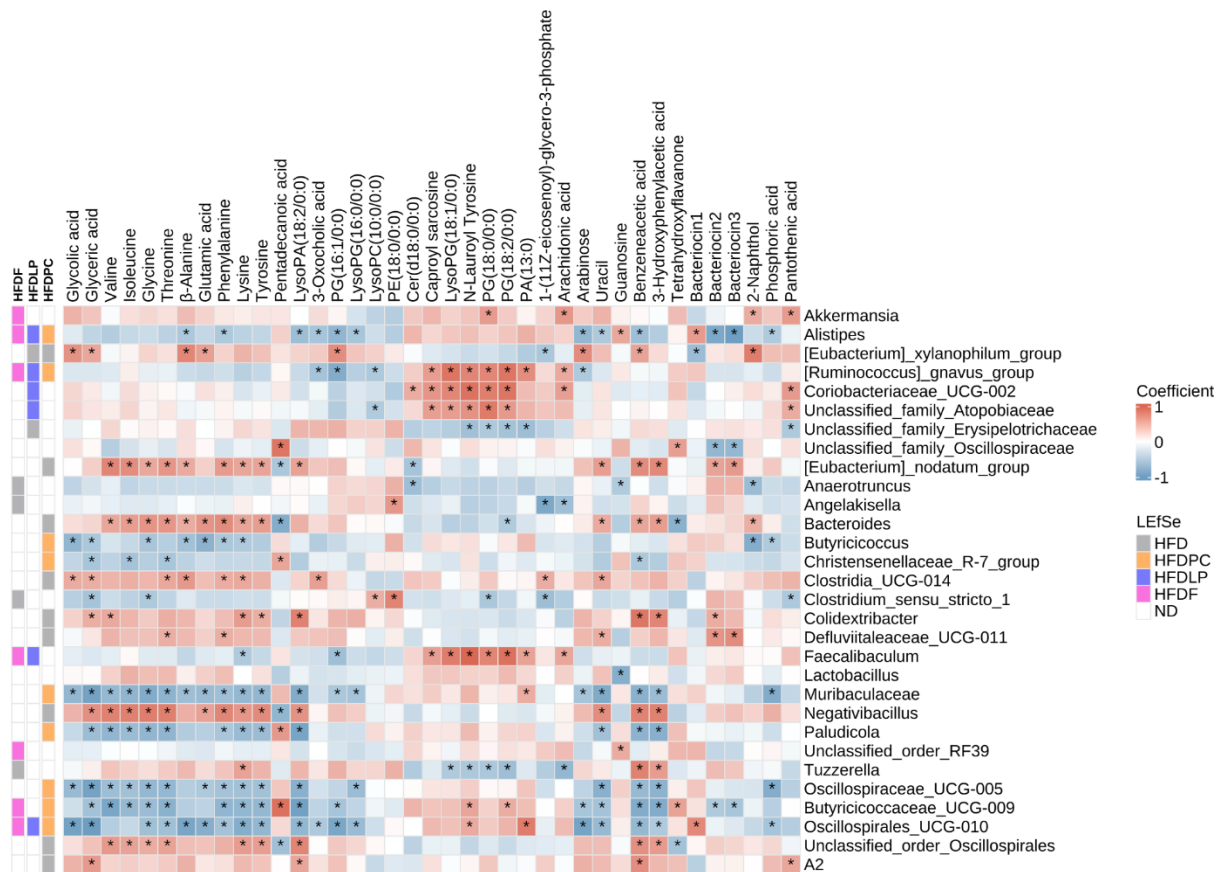

**Supplementary figure 7. Correlation map between the metabolite levels of faeces and observed gut microbiota.** Each square implies Pearson's correlation coefficient between metabolites and assayed activities. Red indicates a positive ( $0 < r < 1$ ) correlation, and blue indicates a negative ( $-1 < r < 0$ ) correlation. Asterisks indicate  $p$ -values  $< 0.05$ .

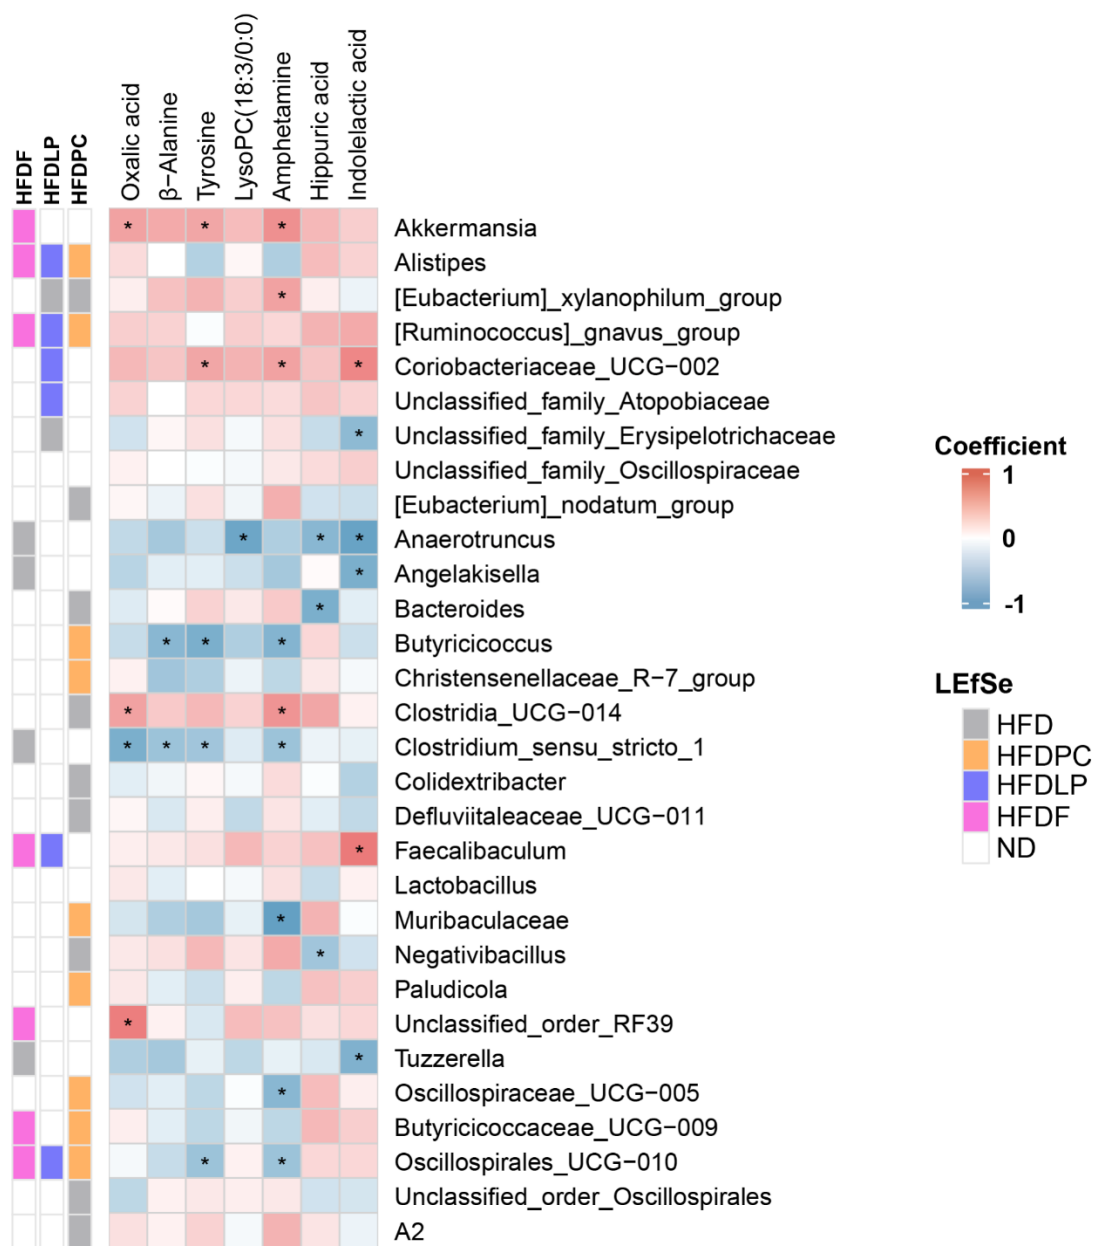

**Supplementary figure 8. Correlation map between the metabolite levels of plasma and observed gut microbiota.** Each square implies Pearson's correlation coefficient between metabolites and assayed activities. Red indicates a positive ( $0 < r < 1$ ) correlation, and blue indicates a negative ( $-1 < r < 0$ ) correlation. Asterisks indicate  $p$ -values  $< 0.05$ .
