# Supplementary material for: Combination of Lacticaseibacillus paracasei BEPC22 and Lactiplantibacillus plantarum BELP53 attenuates fat accumulation and alters the metabolome and gut microbiota in mice with high-fat diet-induced obesity
Source: Royal Society of Chemistry journal article supplement (doi:10.1039/d3fo03557c), 2023-12-15
Supplement: d3fo03557c3.xlsx [file d3fo03557c3.xlsx]

## Sheet: Table S1
	Supplementary Table S1. Significantly different metabolites analyzed by GC-TOF-MS in 4 groups of mouse feces
	No.	RTa (min)	Metabolites	VIP 1	VIP 2	p-value	Unique Mass (m/z)	MS Fragmentation (m/z)	Identificationb
	Organic acids
	1	5.49802	Glycolic acid	1.1601	1.7031	0.0265496	66	66, 148, 205, 177, 149, 74	STD/MS
	2	8.13996	Glyceric acid	2.05922	2.02737	0.000675464	292	189, 292, 133, 205, 102, 190	STD/MS
	Amino acids
	3	7.02315	Valine	2.41213	1.80328	0.0224959	144	144, 218, 145, 100, 74	STD/MS
	4	7.79251	Isoleucine	2.30553	1.89398	0.0125897	158	158, 218, 159, 180, 100, 74	STD/MS
	5	7.92931	Glycine	2.03568	1.8674	0.0140015	174	174, 86, 175, 248, 100, 176	STD/MS
	6	8.66523	Threonine	2.15868	1.70589	0.0368989	218	218, 117, 219, 101, 291, 220	STD/MS
	7	9.0078	β-Alanine	2.12108	1.68922	0.00078787	248	174, 248, 290, 249, 211	MS
	8	10.5756	Glutamic acid	1.73839	1.44453	0.04182	246	246, 128, 247, 156, 348	STD/MS
	9	10.6943	Phenylalanine	2.39717	1.82255	0.0152731	192	218, 192, 219, 220, 193, 266	STD/MS
	10	12.7625	Lysine	2.11626	1.56417	0.00344397	317	174, 317, 156, 128, 145, 318	STD/MS
	11	12.9025	Tyrosine	2.20731	1.71063	0.0092052	218	218, 219, 100, 280, 179	STD/MS
	Fatty acids
	12	12.6006	Pentadecanoic acid	2.16273	1.63968	0.0309453	299	117, 299, 132, 145, 129, 300, 340	MS
	Carbohydrates
	13	10.9824	Arabinose	2.02544	1.48808	0.000170875	189	103, 217, 307, 74, 189	STD/MS
	Nucleotides
	14	8.22638	Uracil	2.54325	2.19138	0.000305061	241	241, 99, 256, 255, 113, 242	STD/MS
	15	17.6016	Guanosine	1.59728	2.21807	0.00412242	324	324, 245, 368, 325, 410	MS
	Benzenoids
	16	7.83872	Phenylacetic acid	2.5889	1.89166	0.00158462	164	75, 164, 142, 91, 193, 74	MS
	17	10.5069	3-Hydroxyphenylacetic acid	2.52094	1.91163	0.00710634	274	274, 164, 275, 112, 296, 252	MS
	Etc.
	18	10.2523	2-Naphthol	0.0204278	1.45619	0.049494	201	201, 216, 145, 202, 100	MS
	19	11.6909	Phosphoric acid	1.29488	1.47364	0.00702299	357	299, 357, 101, 315, 300, 358	MS
	20	13.2633	Pantothenic acid	0.444759	2.03764	0.00703058	291	291, 103, 415, 420, 373	MS
	* Differential metabolites were selected based on the VIP value (>0.7) and p-value (<0.05) from PLS-DA model in Figure 6A. aRetention time; bIdenfication method. MS, mass spectrum compared with the National Institute of Standards and Technology (NIST) database; STD, mass spectrum consistent with standard compounds.

## Sheet: Table S2
	Supplementary Table S2. Significantly different metabolites analyzed by UHPLC-LTQ-Orbitrap-MS/MS in 4 groups of mouse feces
	No.	RTa (min)	Metabolites	VIP 1	VIP 2	p-value	[M-H]-	[M+H]+	Formula	Delta ppm	Fragmentation
	Flavonoids
	1	1.26	Tetrahydroxyflavanone	0.925081	0.954062	0.0302863	287.087	241.082			(-) 287.09> 241.14> 151.03
	Lipids
	2	5.07	LysoPA(18:2/0:0)	2.12537	1.69963	0.00221278	432.232	434.251	C21H38O7P	3.362	(-) 432.23> 312.34> 209.07> 98.08
	3	7.32	3-Oxocholic acid	1.64956	1.32434	0.0360223	451.267	407.28	C24H38O5	-7.749	(-) 451.27> 405.40> 385.40> 325.27
	4	7.29	PG(16:1/0:0)	2.5468	1.83949	0.000129189	527.264	965.518	C22H42O9P	1.666	(-) 527.27> 447.51> 427.31> 357.29
	5	9.32	LysoPG(16:0/0:0)	2.18288	1.54615	0.00613534	483.269	485.292	C22H45O9P	-9.131	(-) 483.27> 255.44> 237.23> 122.17
	6	9.49	LysoPC(10:0/0:0)	2.25837	1.73736	0.000843381	410.234	434.238	C18H38NO7P	5.674	(-) 410.23> 260.07> 124.00
	7	9.82	PE(18:0/0:0)	1.72161	1.65393	0.00683376	481.296	527.297	C23H47O8P	5.905	(-) 481.30> 283.45> 265.22
	8	5.02	Cer(d18:0/0:0)	1.26613	1.17453	0.0391416	301.164	605.339			(-) 301.16> 283.21> 265.17> 221.16
	9	6.64	Caproyl sarcosine	2.11216	1.66732	0.00271457	242.174	244.191	C13H25NO3	-2.117	(-) 242.17> 225.33> 181.34> 153.09
	10	10.1	LysoPG(18:1/0:0)	2.09586	1.54166	0.00605933	509.285	511.306	C24H47O9P	-7.683	(-) 509.28> 281.34> 263.25> 245.16
	11	9.87	N-Lauroyl Tyrosine	2.55905	1.83417	0.000144929	362.235	364.253	C21H33NO4	3.336	(-) 362.23> 343.30> 301.25> 155.14
	12	10.52	PG(18:2/0:0)	2.07852	1.55531	0.00520289	493.29	495.31	C24H47O8P	-7.112	(-) 493.29> 401.33> 265.19> 247.31
	13	10.42	PA(20:1/0:0)	1.76001	1.75454	0.00282586	463.286	509.285	C23H45O7P		(-) 463.29> 445.35> 401.39> 381.44
	14	11.13	Arachidonic acid	2.19867	1.87724	0.000313987	303.231		C20H32O2	-7.201	(-) 303.23> 259.45> 205.15
	15	11.22	PA(13:0)	2.94903	2.08388	1.89704e-08	379.155	425.36	C16H29O8P	7.207	(-) 379.16> 361.36> 343.19> 325.10
	16	11.68	PG(18:0/0:0)	1.97132	1.94183	0.000253479	511.301	557.297	C24H49O9P	-6.753	(-) 511.30> 283.32> 265.25> 245.75
	Bacteriocins
	17	6.48	Bacteriocin 1	1.82858	1.29464	0.0159318	485.217	971.441			(-) 485.22> 440.29> 412.16> 302.19
	18	6.5	Bacteriocin 2	1.90694	1.36907	0.00205609	487.232				(-) 487.19> 407.33> 345.33> 325.27
	19	7.33	Bacteriocin 3	1.42841	1.02774	0.0156367	471.238	943.482			(-) 471.24> 427.35> 377.26> 347.30
	* Differential metabolites were selected based on the VIP value (>0.7) and p-value (<0.05) from PLS-DA model in Figure 6A. aRetention time

## Sheet: Table S3
	Supplementary Table S3. Significantly different metabolites analyzed by GC-TOF-MS in 4 groups of mouse plasma
	No.	RTa (min)	Metabolites	VIP 1	VIP 2	p-value	Unique Mass (m/z)	MS Fragmentation (m/z)	Identificationb
	Organic acids
	1	6.11537	Oxalic acid	0.488074	1.79503	0.0250416	147	147, 148, 66, 74, 72, 190	STD/MS
	Amino acids
	2	9.00708	β-Alanine	1.89613	2.1642	0.00669538	248	174, 248, 290, 86, 249	MS
	3	12.9033	Tyrosine	0.323125	1.64491	0.0459817	218	218, 219, 100, 179, 220	STD/MS
	Benzenoid
	4	8.43581	Amphetamine	0.459479	1.76241	0.0108237	188	188, 262, 263, 290, 264	MS
	* Differential metabolites were selected based on the VIP value (>0.7) and p-value (<0.05) from PLS-DA model in Figure 6A. aRetention time; bIdenfication method. MS, mass spectrum compared with the National Institute of Standards and Technology (NIST) database; STD, mass spectrum consistent with standard compounds.

## Sheet: Table S4
	Supplementary Table S4. Significantly different metabolites analyzed by UHPLC-LTQ-Orbitrap-MS/MS in 4 groups of mouse plasma
	No.	RTa (min)	Metabolites	VIP 1	VIP 2	p-value	[M-H]-	[M+H]+	Formula	Delta ppm	Fragmentation
	Lipid
	1	8.3	LysoPC(18:3/0:0)	2.083	1.43603	0.0345238	562.314	518.323	C26H48NO7P	-2.244	(-)562.31>502.50>277.36
	Benzenoid
	2	3.9	Hippuric acid	2.22704	1.48729	0.0143569	178.051		C9H9NO3	0.862	(-)178.05> 134.04> 77.07, 91.06
	Indole
	3	5.27	Indolelactic acid	2.13842	1.43437	0.0195812	204.067	206.081	C11H11NO3	1.291	(-)204.07>186.04>142.03
	* Differential metabolites were selected based on the VIP value (>0.7) and p-value (<0.05) from PLS-DA model in Figure 6A. aRetention time
